# Supplementary material for: CRISPR/Cas13 effectors have differing extents of off-target effects that limit their utility in eukaryotic cells
Source: PubMed Central journal article supplement (PMC9226543; doi:10.1093/nar/gkac159), 2022-03-04
Supplement: gkac159_supplemental_file.pdf [file gkac159_supplemental_file.pdf]

## SUPPLEMENTARY FIGURES

**A**

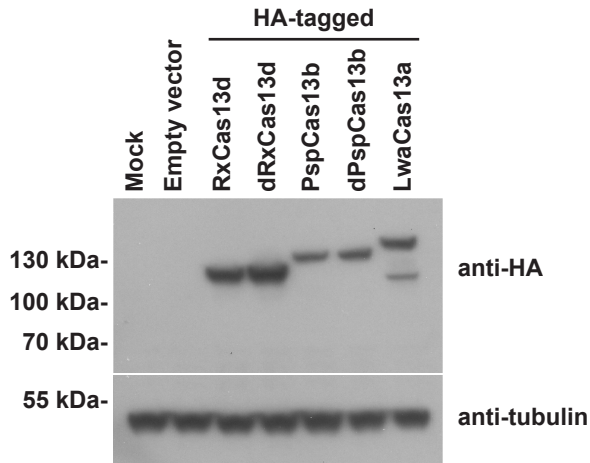

**B**

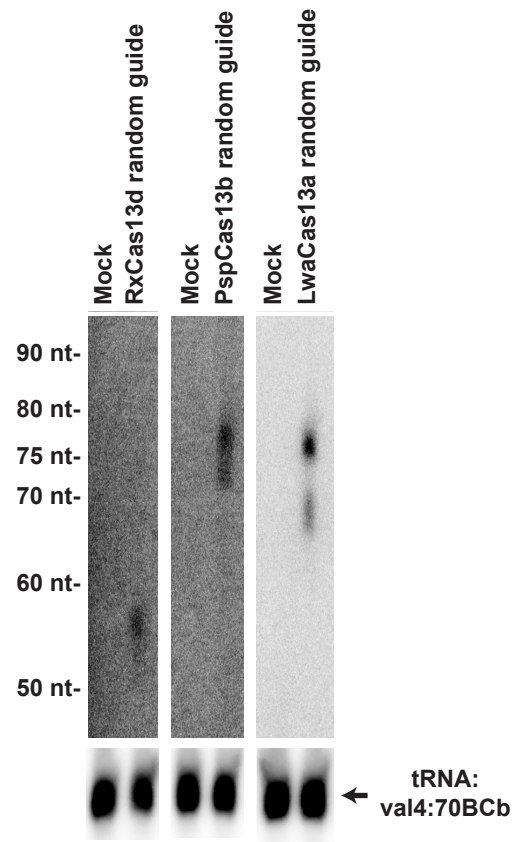

**C**

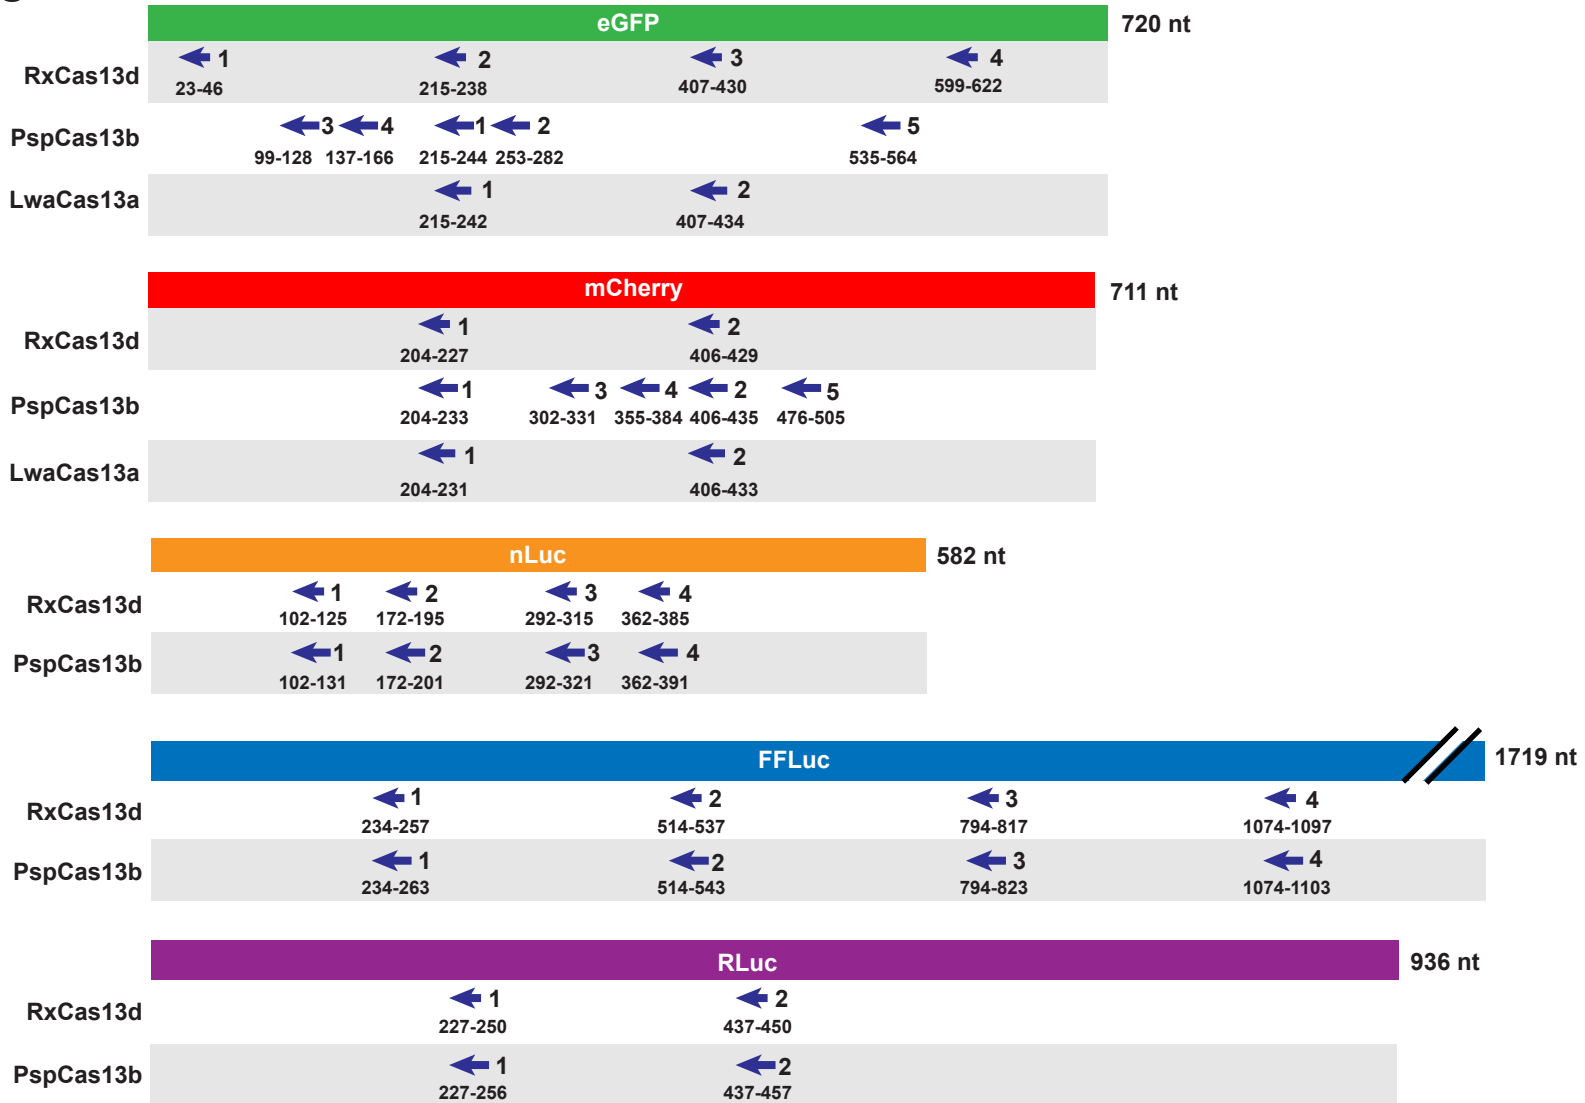

**Supplementary Figure S1. *Drosophila* Cas13 and guide RNA expression plasmids. (A-B)** Analogous to Figure 1A, *Drosophila* DL1 cells were co-transfected with (i) 50 ng of plasmid that expresses the indicated HA-tagged Cas13 effector as well as a random guide RNA, (ii) 225 ng of plasmid that expresses eGFP from the copper-inducible MtnA promoter, and (iii) 225 ng of plasmid that expresses mCherry from the MtnA promoter. 24 hr after transfection, CuSO<sub>4</sub> was added for 14 hr and total protein **(A)** or RNA **(B)** was then isolated. **(A)** Representative Western blot using an  $\alpha$ -HA antibody to confirm Cas13 effector protein expression.  $\alpha$ -Tubulin was used as a loading control. **(B)** Northern blots using 8% polyacrylamide gels (20  $\mu$ g of total RNA/lane) were performed to detect guide RNA expression. Expected guide RNA lengths: RxCas13d (59 nt), PspCas13b (75 nt), LwaCas13a (71 nt). tRNA:val4:70BCb was used as a loading control. **(C)** The guide RNAs complementary to eGFP, mCherry, nanoluciferase (nLuc), firefly luciferase (FFLuc), and Renilla luciferase (RLuc) that were used in this study.

## Supplementary Figure S2

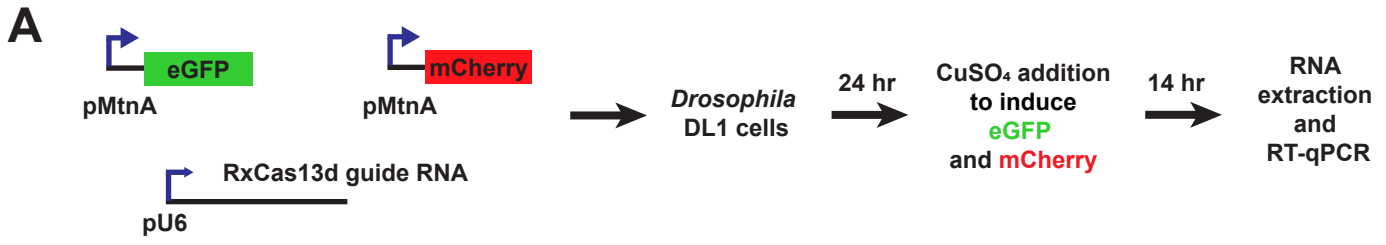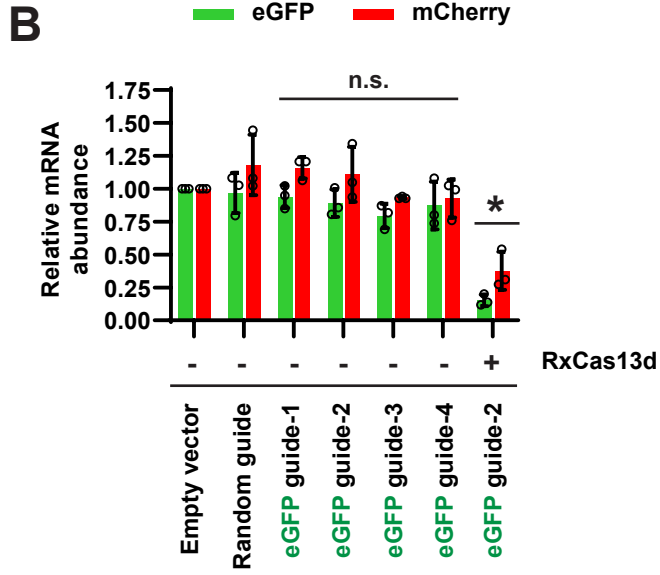

**Supplementary Figure S2. Transfection of a RxCas13d guide RNA alone is insufficient to deplete target mRNAs in *Drosophila* cells.** (A) *Drosophila* DL1 cells were co-transfected with (i) 50 ng of plasmid that constitutively expresses a guide RNA from the U6 promoter, (ii) 225 ng of plasmid that expresses eGFP from the copper-inducible MtnA promoter, and (iii) 225 ng of plasmid that expresses mCherry from the MtnA promoter. 24 hr after transfection, CuSO<sub>4</sub> was added and total RNA was isolated after an additional 14 hr. (B) RT-qPCR was used to quantify relative expression of eGFP and mCherry mRNAs. As a positive control, a plasmid expressing the RxCas13d effector as well as a guide RNA complementary to eGFP was used. Data are shown as mean ± SD, N=3. For statistical comparisons, data were compared to the random guide RNA samples. (\*)  $P < 0.05$ . n.s., not significant.

Supplementary Figure S3

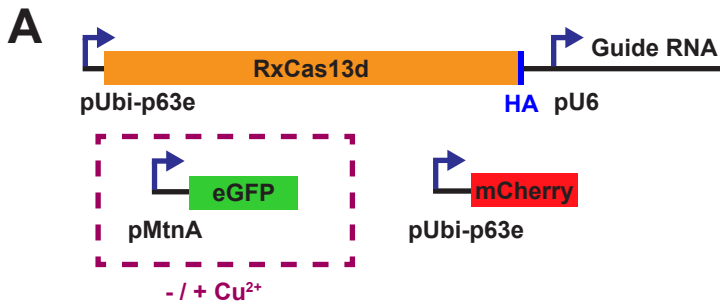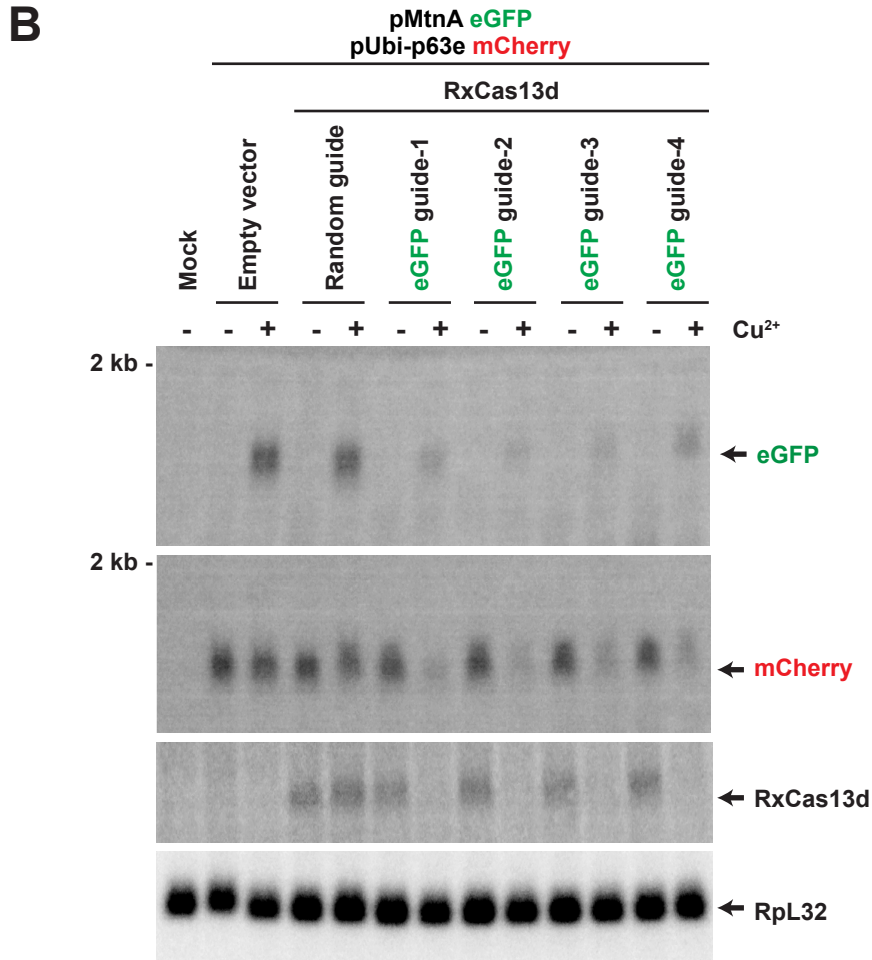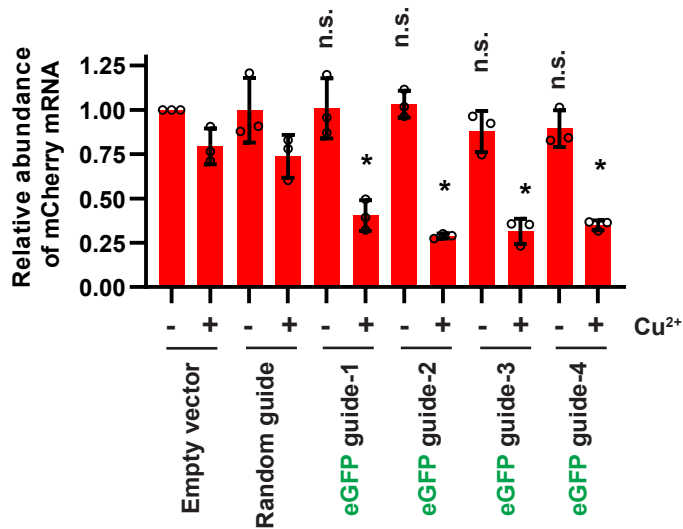

**Supplementary Figure S3. RxCas13d off-target effects are dependent on transcription of the target mRNA in *Drosophila* cells.** (A) *Drosophila* DL1 cells were co-transfected with (i) 50 ng of plasmid that constitutively expresses a guide RNA from the U6 promoter as well as catalytically active RxCas13d from the Ubi-p63e promoter, (ii) 225 ng of plasmid that expresses eGFP from the copper-inducible MtnA promoter, and (iii) 225 ng of plasmid that expresses mCherry from the Ubi-p63e promoter. After 24 hr, expression of eGFP was (+) or was not (-) induced by adding CuSO<sub>4</sub> for 14 hr, as indicated. (B) Total RNA was then isolated and Northern blots (20 μg of total RNA/lane) used to quantify the relative expression levels of eGFP, mCherry, and RxCas13d mRNAs. Representative blots are shown. mCherry mRNA expression data are shown as mean ± SD, N=3. For statistical comparisons, data were compared to the random guide RNA samples. (\*)  $P < 0.05$ . n.s., not significant.

**A**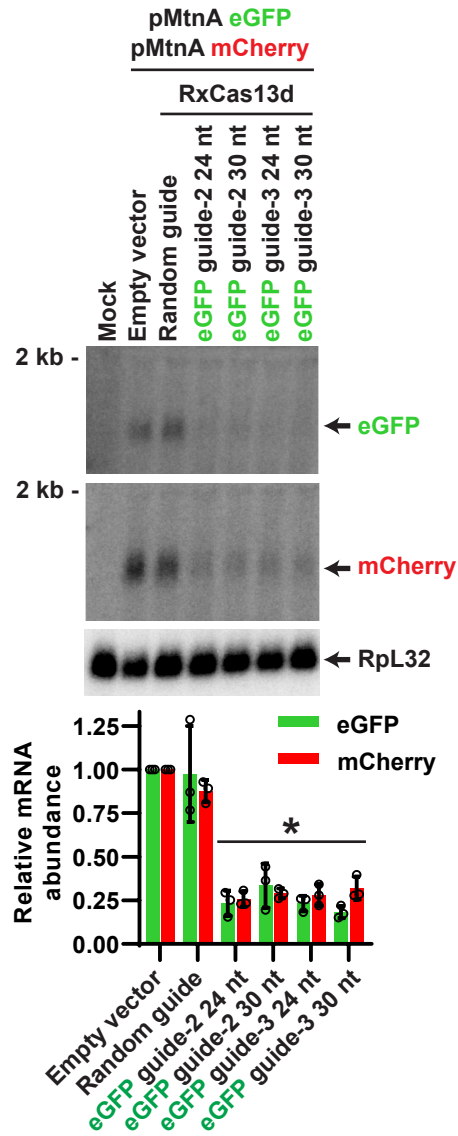**B**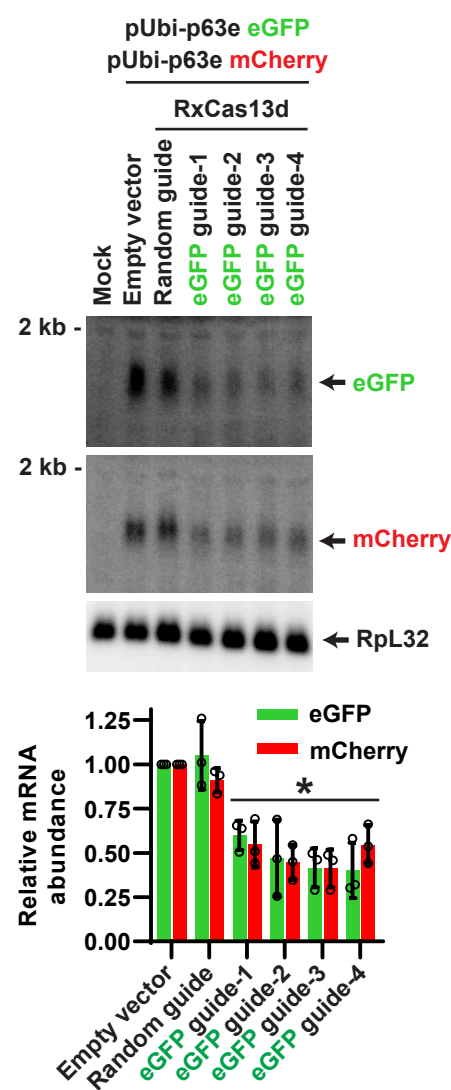**C**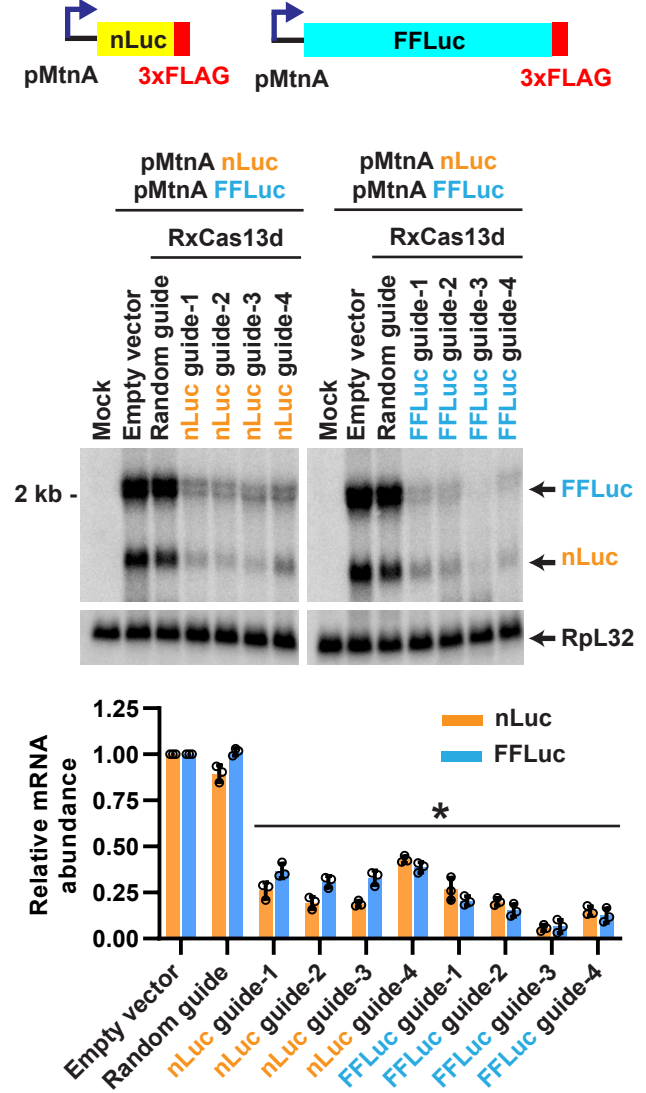**D***Drosophila* S2 cells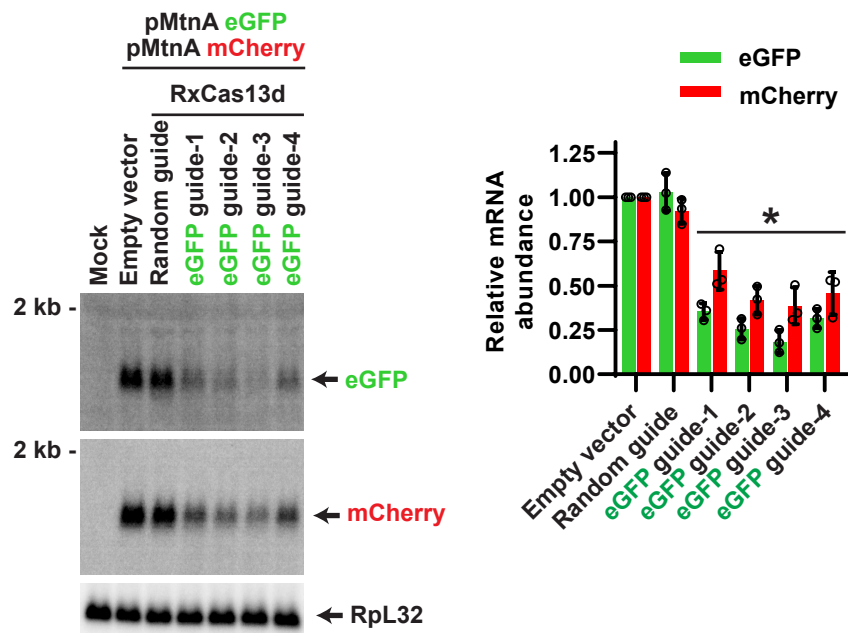



**Supplementary Figure S4. Strong off-target effects of RxCas13d are observed under multiple conditions in *Drosophila* cells.** **(A)** *Drosophila* DL1 cells were co-transfected with RxCas13d-guide RNA (50 ng), eGFP (225 ng), and mCherry (225 ng) expression plasmids as described in Figure 1A except that two different lengths (24 and 30 nt) of guide RNA spacers were tested. 24 hr after transfection, CuSO<sub>4</sub> was added and total RNA was isolated after an additional 14 hr. Northern blots (20 μg of total RNA/lane) were then performed to quantify expression of eGFP and mCherry mRNAs. **(B)** *Drosophila* DL1 cells were co-transfected as in Figure 1A except that eGFP and mCherry were expressed from the constitutive Ubi-p63e promoter (not the copper-inducible MtnA promoter). 40 hr after transfection, total RNA was isolated and Northern blots performed (20 μg of total RNA/lane). **(C)** *Drosophila* DL1 cells were co-transfected with (i) 50 ng of plasmid expressing RxCas13d and a guide RNA complementary to nLuc (left) or FFLuc (right), (ii) 225 ng of plasmid that expresses 3xFLAG tagged nLuc from the copper-inducible MtnA promoter, and (iii) 225 ng of plasmid that expresses 3xFLAG tagged FFLuc from the MtnA promoter. 24 hr after transfection, CuSO<sub>4</sub> was added and total RNA was isolated after an additional 14 hr. Northern blotting (20 μg of total RNA/lane) using a probe complementary to the 3xFLAG tag was then performed. **(D)** *Drosophila* S2 cells were co-transfected with (i) 200 ng of plasmid that expresses RxCas13d and a guide RNA complementary to eGFP, (ii) 900 ng of plasmid that expresses eGFP from the copper-inducible MtnA promoter, and (iii) 900 ng of plasmid that expresses mCherry from the MtnA promoter. 24 hr after transfection, CuSO<sub>4</sub> was added and total RNA was isolated after an additional 14 hr. Northern blotting (20 μg of total RNA/lane) was then performed. For all panels **(A-D)**, representative Northern blots are shown. ImageQuant was used to quantify the relative expression levels of the indicated mRNAs (normalized to the empty vector samples) from three independent experiments. Rpl32 mRNA served as an endogenous loading control. Data are shown as mean ± SD. For statistical comparisons, data were compared to the random guide RNA samples. (\*)  $P < 0.05$ .

Supplementary Figure S5

**A**

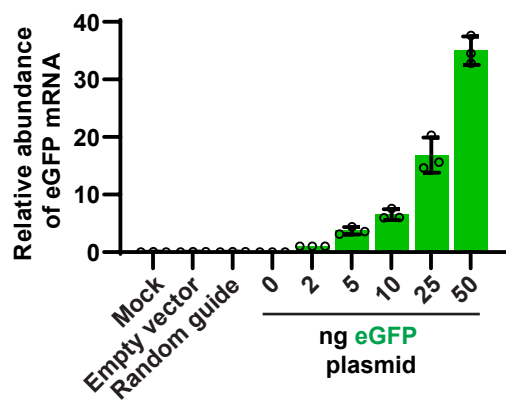

**B**

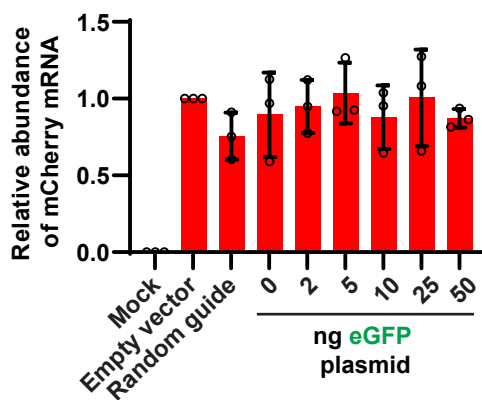

**C**

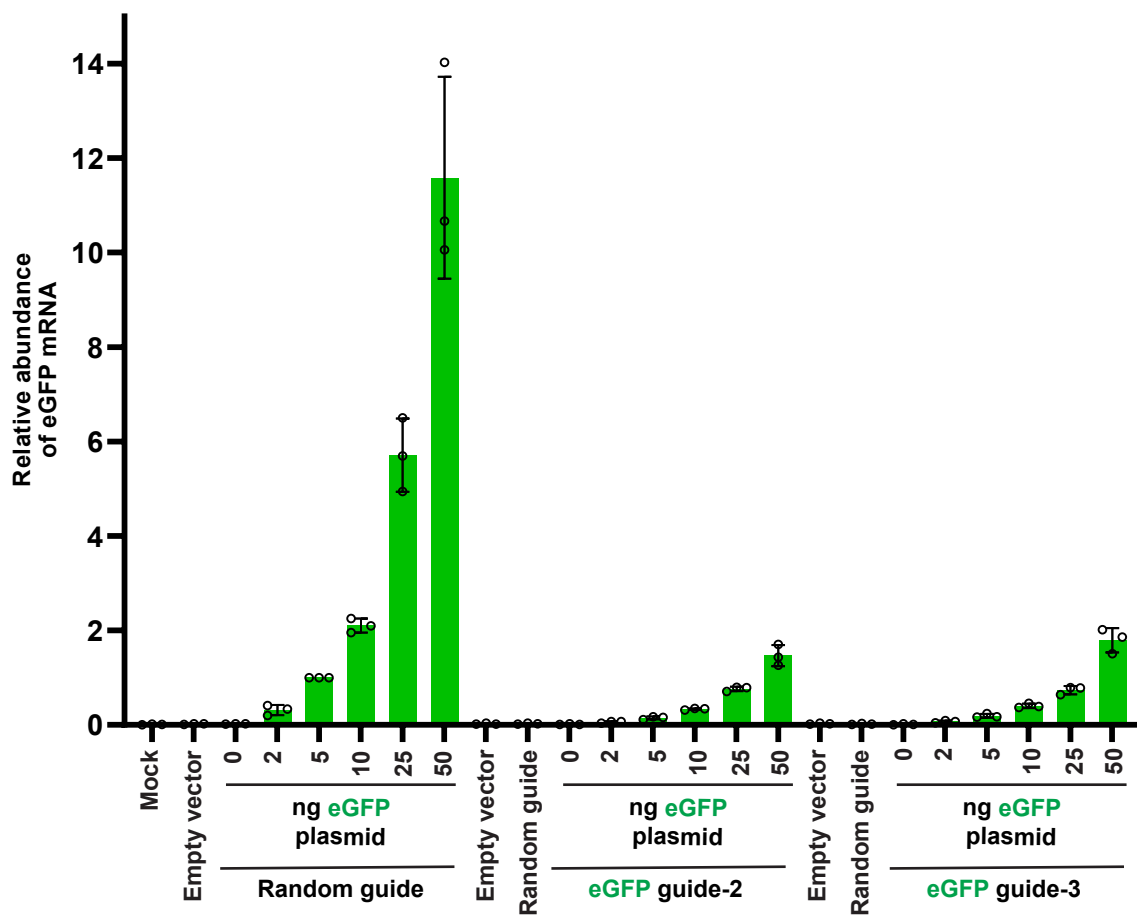

**Supplementary Figure S5. Titration of eGFP target mRNA expression to characterize dose-dependent off-target effects of RxCas13d in *Drosophila* cells. (A-B)** *Drosophila* DL1 cells were transfected with increasing amounts of copper-inducible eGFP expression plasmid (0, 2, 5, 10, 25, or 50 ng) along with a constant amount (225 ng) of copper-inducible mCherry expression plasmid. Empty vector (pUb-3xFLAG MCS (No BsmBI) plasmid) was added as needed so that 500 ng DNA was transfected in all samples. 24 hr after transfection, CuSO<sub>4</sub> was added for 14 hr and total RNA then isolated. RT-qPCR was used to quantify relative expression of eGFP **(A)** and mCherry **(B)** mRNAs. eGFP data were normalized to the 'eGFP 2 ng' sample, while mCherry data were normalized to the 'empty vector' samples. Data are shown as mean ± SD, N=3. **(C)** Same RT-qPCR data as in Figure 3B, but with all eGFP expression levels normalized to the 'eGFP 5 ng - Random guide RNA' sample. Data are shown as mean ± SD, N=3.

Supplementary Figure S6

**A**

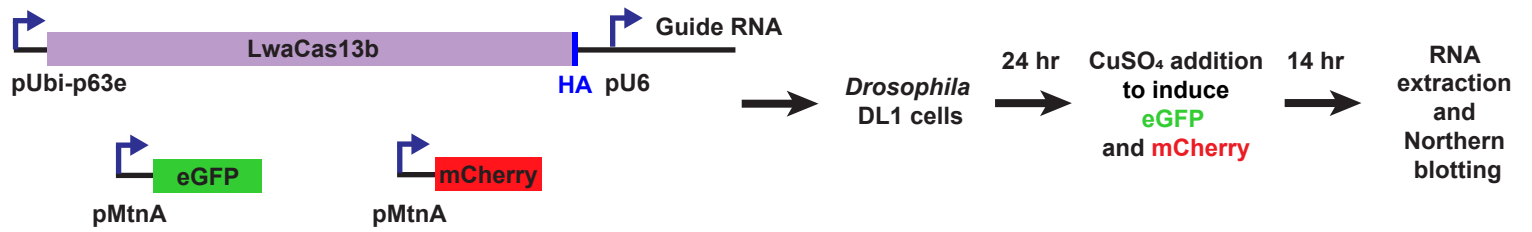

**B**

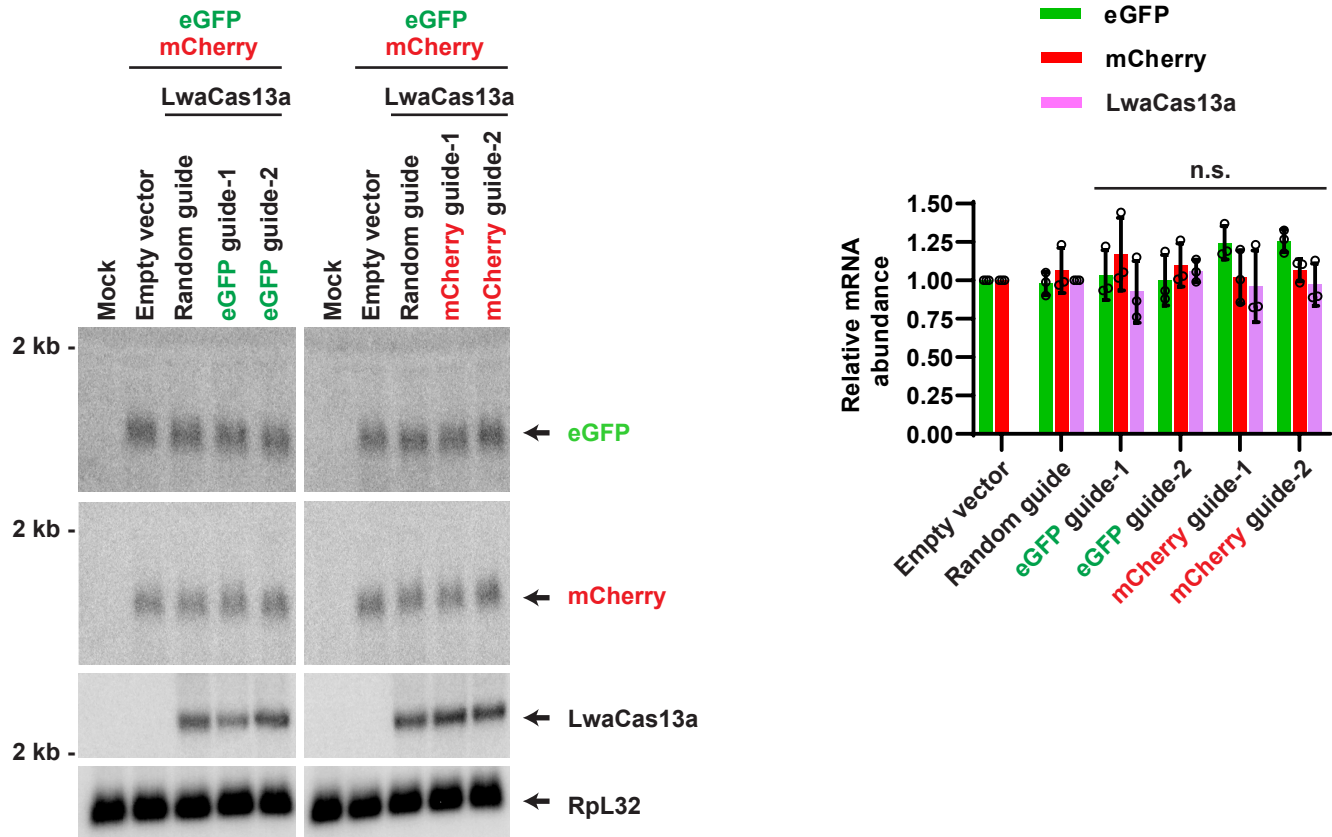

**Supplementary Figure S6. LwaCas13a failed to deplete target RNAs in *Drosophila* cells.**

**(A)** Co-transfection assay analogous to Figure 1A except that LwaCas13a rather than RxCas13d was examined. *Drosophila* DL1 cells were co-transfected with (i) 50 ng of plasmid that constitutively expresses a guide RNA from the U6 promoter as well as HA-tagged LwaCas13a from the Ubi-p63e promoter, (ii) 225 ng of plasmid that expresses eGFP from the copper-inducible MtnA promoter, and (iii) 225 ng of plasmid that expresses mCherry from the MtnA promoter. 24 hr after transfection, CuSO<sub>4</sub> was added and total RNA was isolated after an additional 14 hr. Northern blots were then performed. **(B)** Representative Northern blots (20 μg of total RNA/lane) are shown from experiments in which guide RNAs complementary to eGFP (left) or mCherry (right) were used. ImageQuant was used to quantify the relative expression levels of eGFP, mCherry, and LwaCas13a mRNAs from three independent experiments. eGFP and mCherry mRNA expression was normalized to the empty vector samples, while LwaCas13a mRNA expression was normalized to the random guide RNA samples. Data are shown as mean ± SD. n.s., not significant.

Supplementary Figure S7

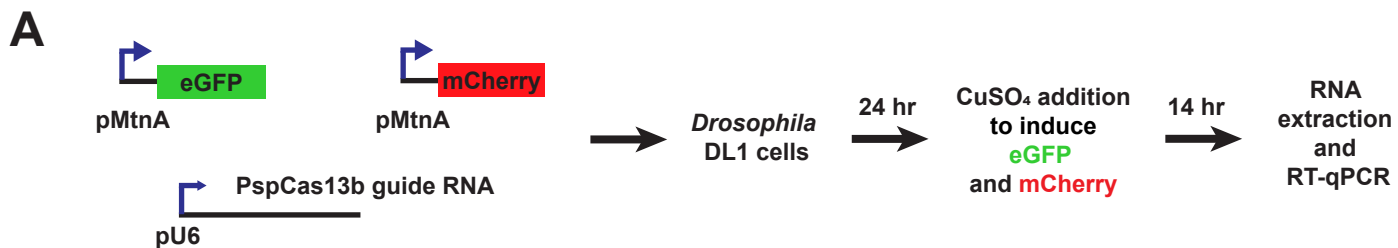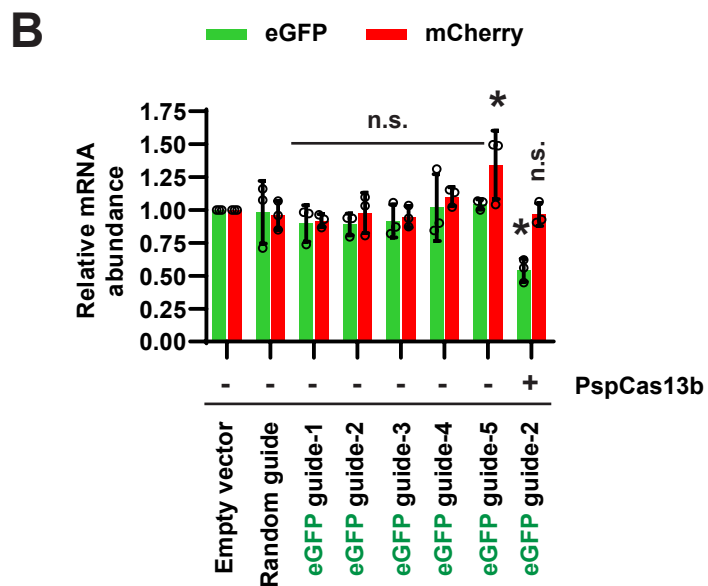

**Supplementary Figure S7. Transfection of a PspCas13b guide RNA alone is insufficient to deplete target mRNAs in *Drosophila* cells.** (A) *Drosophila* DL1 cells were co-transfected with (i) 50 ng of plasmid that constitutively expresses a guide RNA from the U6 promoter, (ii) 225 ng of plasmid that expresses eGFP from the copper-inducible MtnA promoter, and (iii) 225 ng of plasmid that expresses mCherry from the MtnA promoter. 24 hr after transfection, CuSO<sub>4</sub> was added and total RNA was isolated after an additional 14 hr. (B) RT-qPCR was used to quantify relative expression of eGFP and mCherry mRNAs. As a positive control, a plasmid expressing the PspCas13b effector as well as a guide RNA complementary to eGFP was used. Data are shown as mean ± SD, N=3. For statistical comparisons, data were compared to the random guide RNA samples. (\*)  $P < 0.05$ . n.s., not significant.

**A**pMtnA eGFP  
pMtnA mCherry

PspCas13b

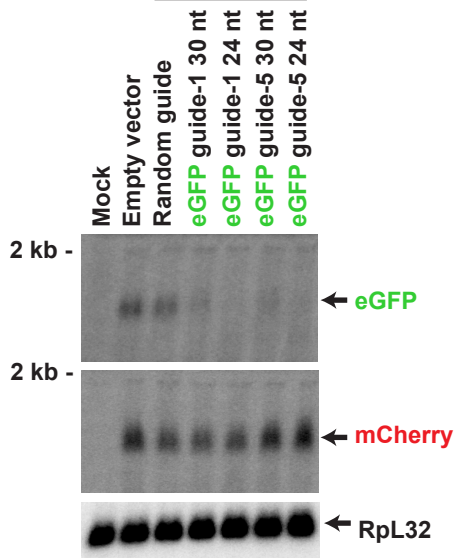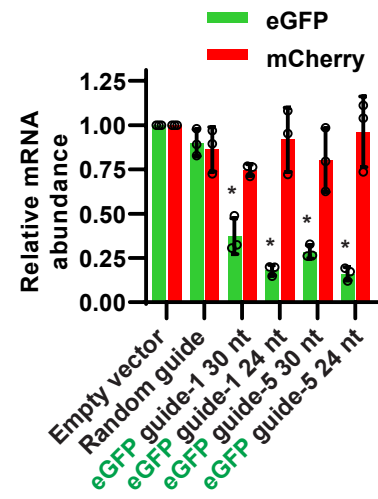**B**pUbi-p63e eGFP  
pUbi-p63e mCherry

PspCas13b

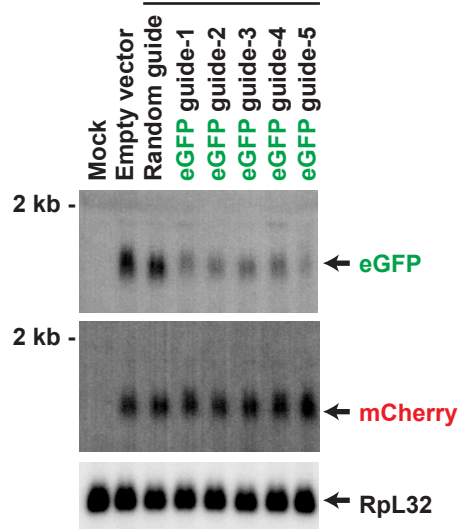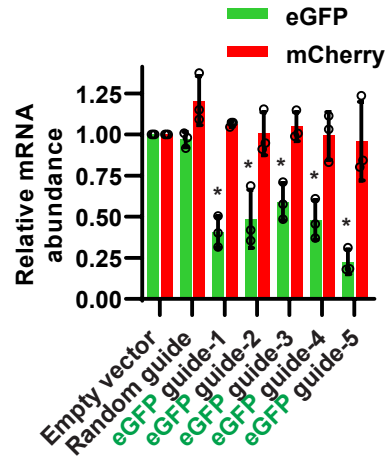**C**pMtnA nLuc 3xFLAG  
pMtnA FFLuc 3xFLAG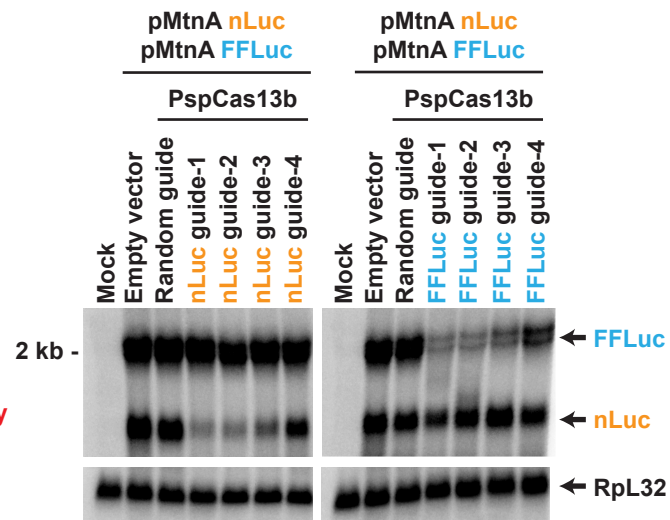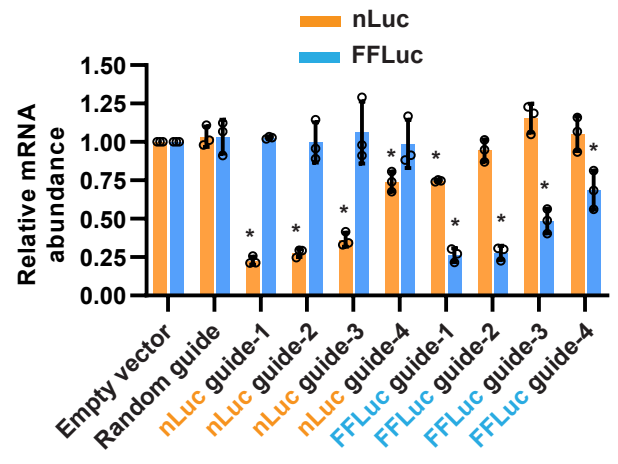**D***Drosophila* S2 cellpMtnA eGFP  
pMtnA mCherry

PspCas13b

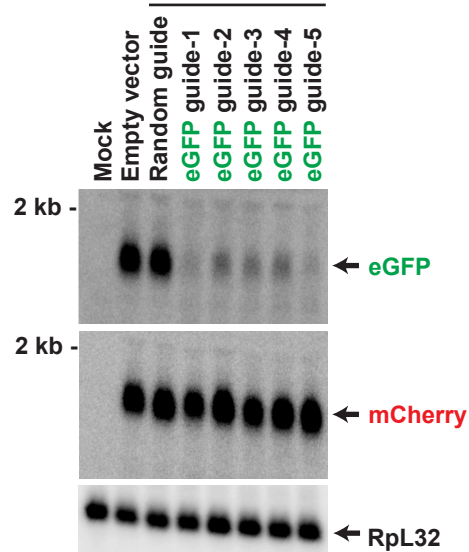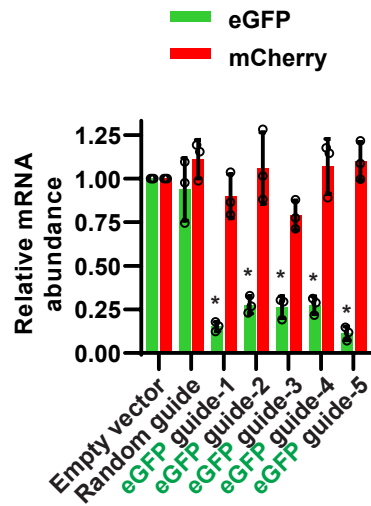



**Supplementary Figure S8. PspCas13b has good specificity under multiple conditions in *Drosophila* cells.** These experiments are the same as those performed in Supplementary Figure S4 except that PspCas13b rather than RxCas13d was examined. **(A)** *Drosophila* DL1 cells were co-transfected with PspCas13b-guide RNA (50 ng), eGFP (225 ng), and mCherry (225 ng) expression plasmids. Two different lengths (24 and 30 nt) of guide RNA spacers were tested. 24 hr after transfection, CuSO<sub>4</sub> was added and total RNA was isolated after an additional 14 hr. Northern blots (20 μg of total RNA/lane) were then performed to quantify expression of eGFP and mCherry mRNAs. **(B)** *Drosophila* DL1 cells were co-transfected as in Figure 4A except that the eGFP and mCherry expression plasmids were driven by the constitutive Ubi-p63e promoter (not the copper-inducible MtnA promoter). 40 hr after transfection, total RNA was isolated and Northern blots (20 μg of total RNA/lane) performed. **(C)** *Drosophila* DL1 cells were co-transfected with (i) 50 ng of plasmid expressing PspCas13b and a guide RNA complementary to nLuc (left) or FFLuc (right), (ii) 225 ng of plasmid that expresses 3xFLAG tagged nLuc from the copper-inducible MtnA promoter, and (iii) 225 ng of plasmid that expresses 3xFLAG tagged FFLuc from the MtnA promoter. 24 hr after transfection, CuSO<sub>4</sub> was added and total RNA was isolated after an additional 14 hr. Northern blotting (20 μg of total RNA/lane) using a probe complementary to the 3xFLAG tag was then performed. **(D)** *Drosophila* S2 cells were co-transfected with (i) 500 ng of plasmid that expresses PspCas13b and a guide RNA complementary to eGFP, (ii) 750 ng of plasmid that expresses eGFP from the copper-inducible MtnA promoter, and (iii) 750 ng of plasmid that expresses mCherry from the MtnA promoter. 24 hr after transfection, CuSO<sub>4</sub> was added and total RNA was isolated after an additional 14 hr. Northern blotting (20 μg of total RNA/lane) was then performed. For all panels **(A-D)**, representative Northern blots are shown. ImageQuant was used to quantify the relative expression levels of the indicated mRNAs (normalized to the empty vector samples) from three independent experiments. RpL32 mRNA served as an endogenous loading control. Data are shown as mean ± SD. For statistical comparisons, data were compared to the random guide RNA samples. (\*)  $P < 0.05$ .

**A**

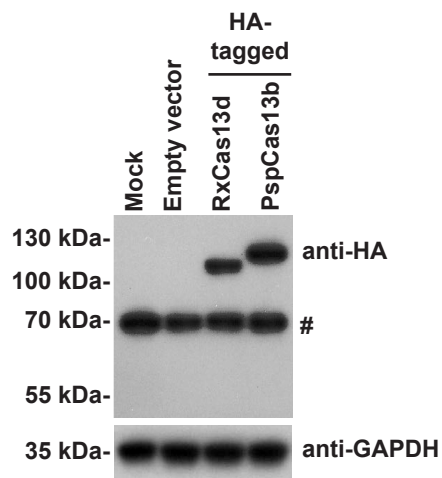

**C**

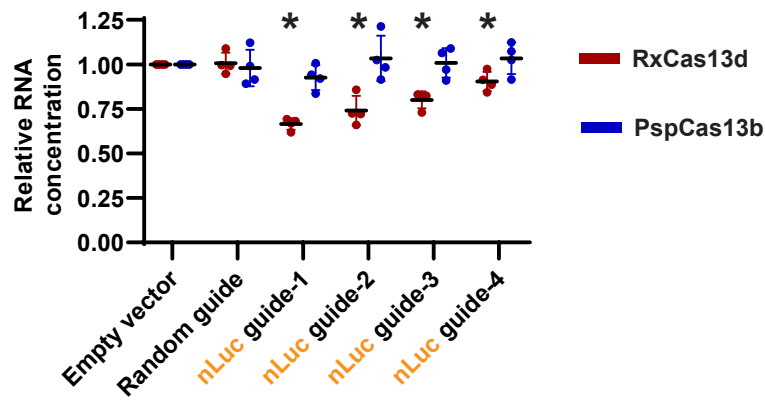

**B**

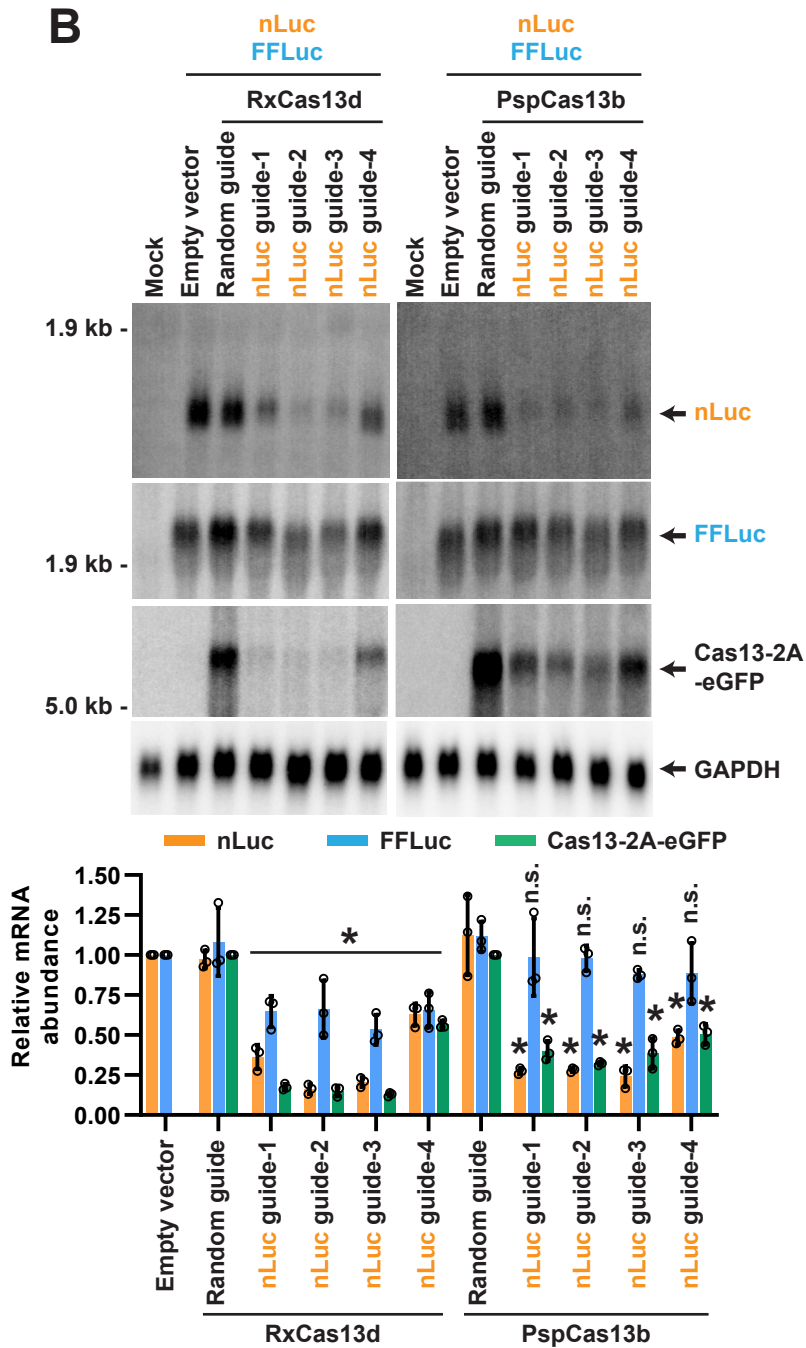

**D**

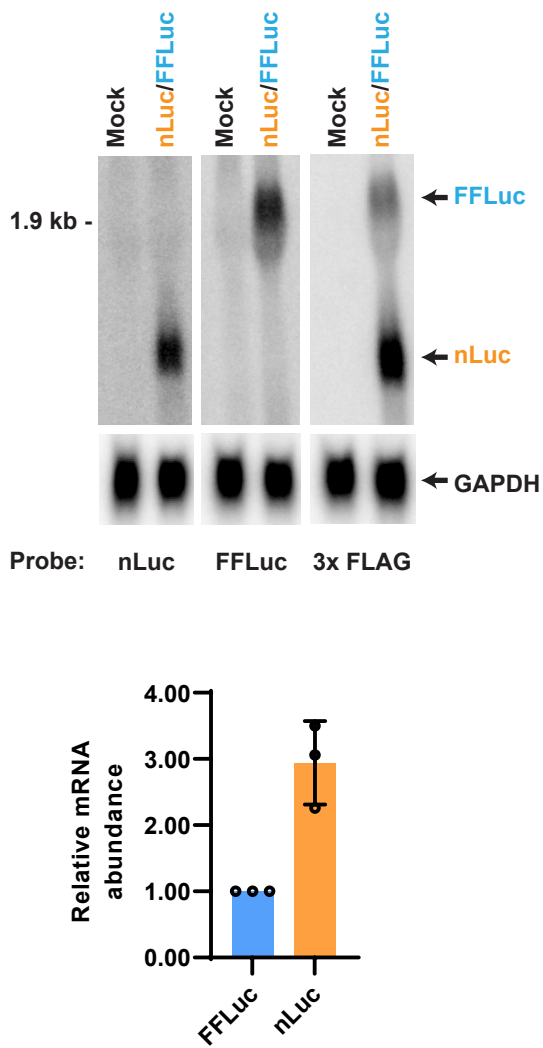

**Supplementary Figure S9. Specificity of RxCas13d and PspCas13b in HeLa cells when nLuc and FFLuc were co-transfected. (A-C)** Analogous to Figure 6A, HeLa cells were co-transfected with (i) 300 ng of plasmid that expresses HA-tagged Cas13 protein followed by a 2A peptide and eGFP, (ii) 200 ng of plasmid that expresses a guide RNA, (iii) 250 ng of plasmid that expresses 3xFLAG-tagged nLuc, and (iv) 250 ng of plasmid that expresses 3xFLAG-tagged FFLuc. 48 hr after transfection, total protein **(A)** or RNA **(B-C)** was isolated. **(A)** A representative Western blot using an  $\alpha$ -HA antibody to confirm Cas13 protein expression (Note: random guide RNA plasmid was co-transfected).  $\alpha$ -GAPDH was used as a loading control. # denotes non-specific band. **(B)** Representative Northern blots (20  $\mu$ g of total RNA/lane) are shown. ImageQuant was used to quantify the relative expression levels of nLuc, FFLuc, and Cas13-2A-eGFP mRNAs. nLuc and FFLuc mRNA expression was normalized to the empty vector (pBEVY-L) samples, while Cas13-2A-eGFP mRNA expression was normalized to the random guide RNA samples. GAPDH mRNA served as an endogenous loading control. Data are shown as mean  $\pm$  SD, N=3. For statistical comparisons, data were compared to the random guide RNA samples. (\*)  $P < 0.05$ . **(C)** Relative RNA concentrations obtained from the co-transfection assays when the RxCas13d or PspCas13b expression plasmids were used. Data are normalized to the empty vector samples and shown as mean  $\pm$  SD, N=4. (\*)  $P < 0.05$ . **(D)** HeLa cells were co-transfected with (i) 250 ng of plasmid that expresses 3xFLAG-tagged nLuc, (ii) 250 ng of plasmid that expresses 3xFLAG-tagged FFLuc, and (iii) 500 ng of empty vector (pBEVY-L). 48 hr after transfection, total RNA was isolated. Northern blots (20  $\mu$ g of total RNA/lane) were then performed using probes complementary to nLuc, FFLuc, or the 3xFLAG that detects both nLuc and FFLuc mRNAs. ImageQuant was used to quantify the relative expression levels of nLuc and FFLuc mRNAs that were detected using the 3x FLAG probe. nLuc expression was normalized to FFLuc expression. Data are shown as mean  $\pm$  SD, N=3.

# Supplementary Figure S10

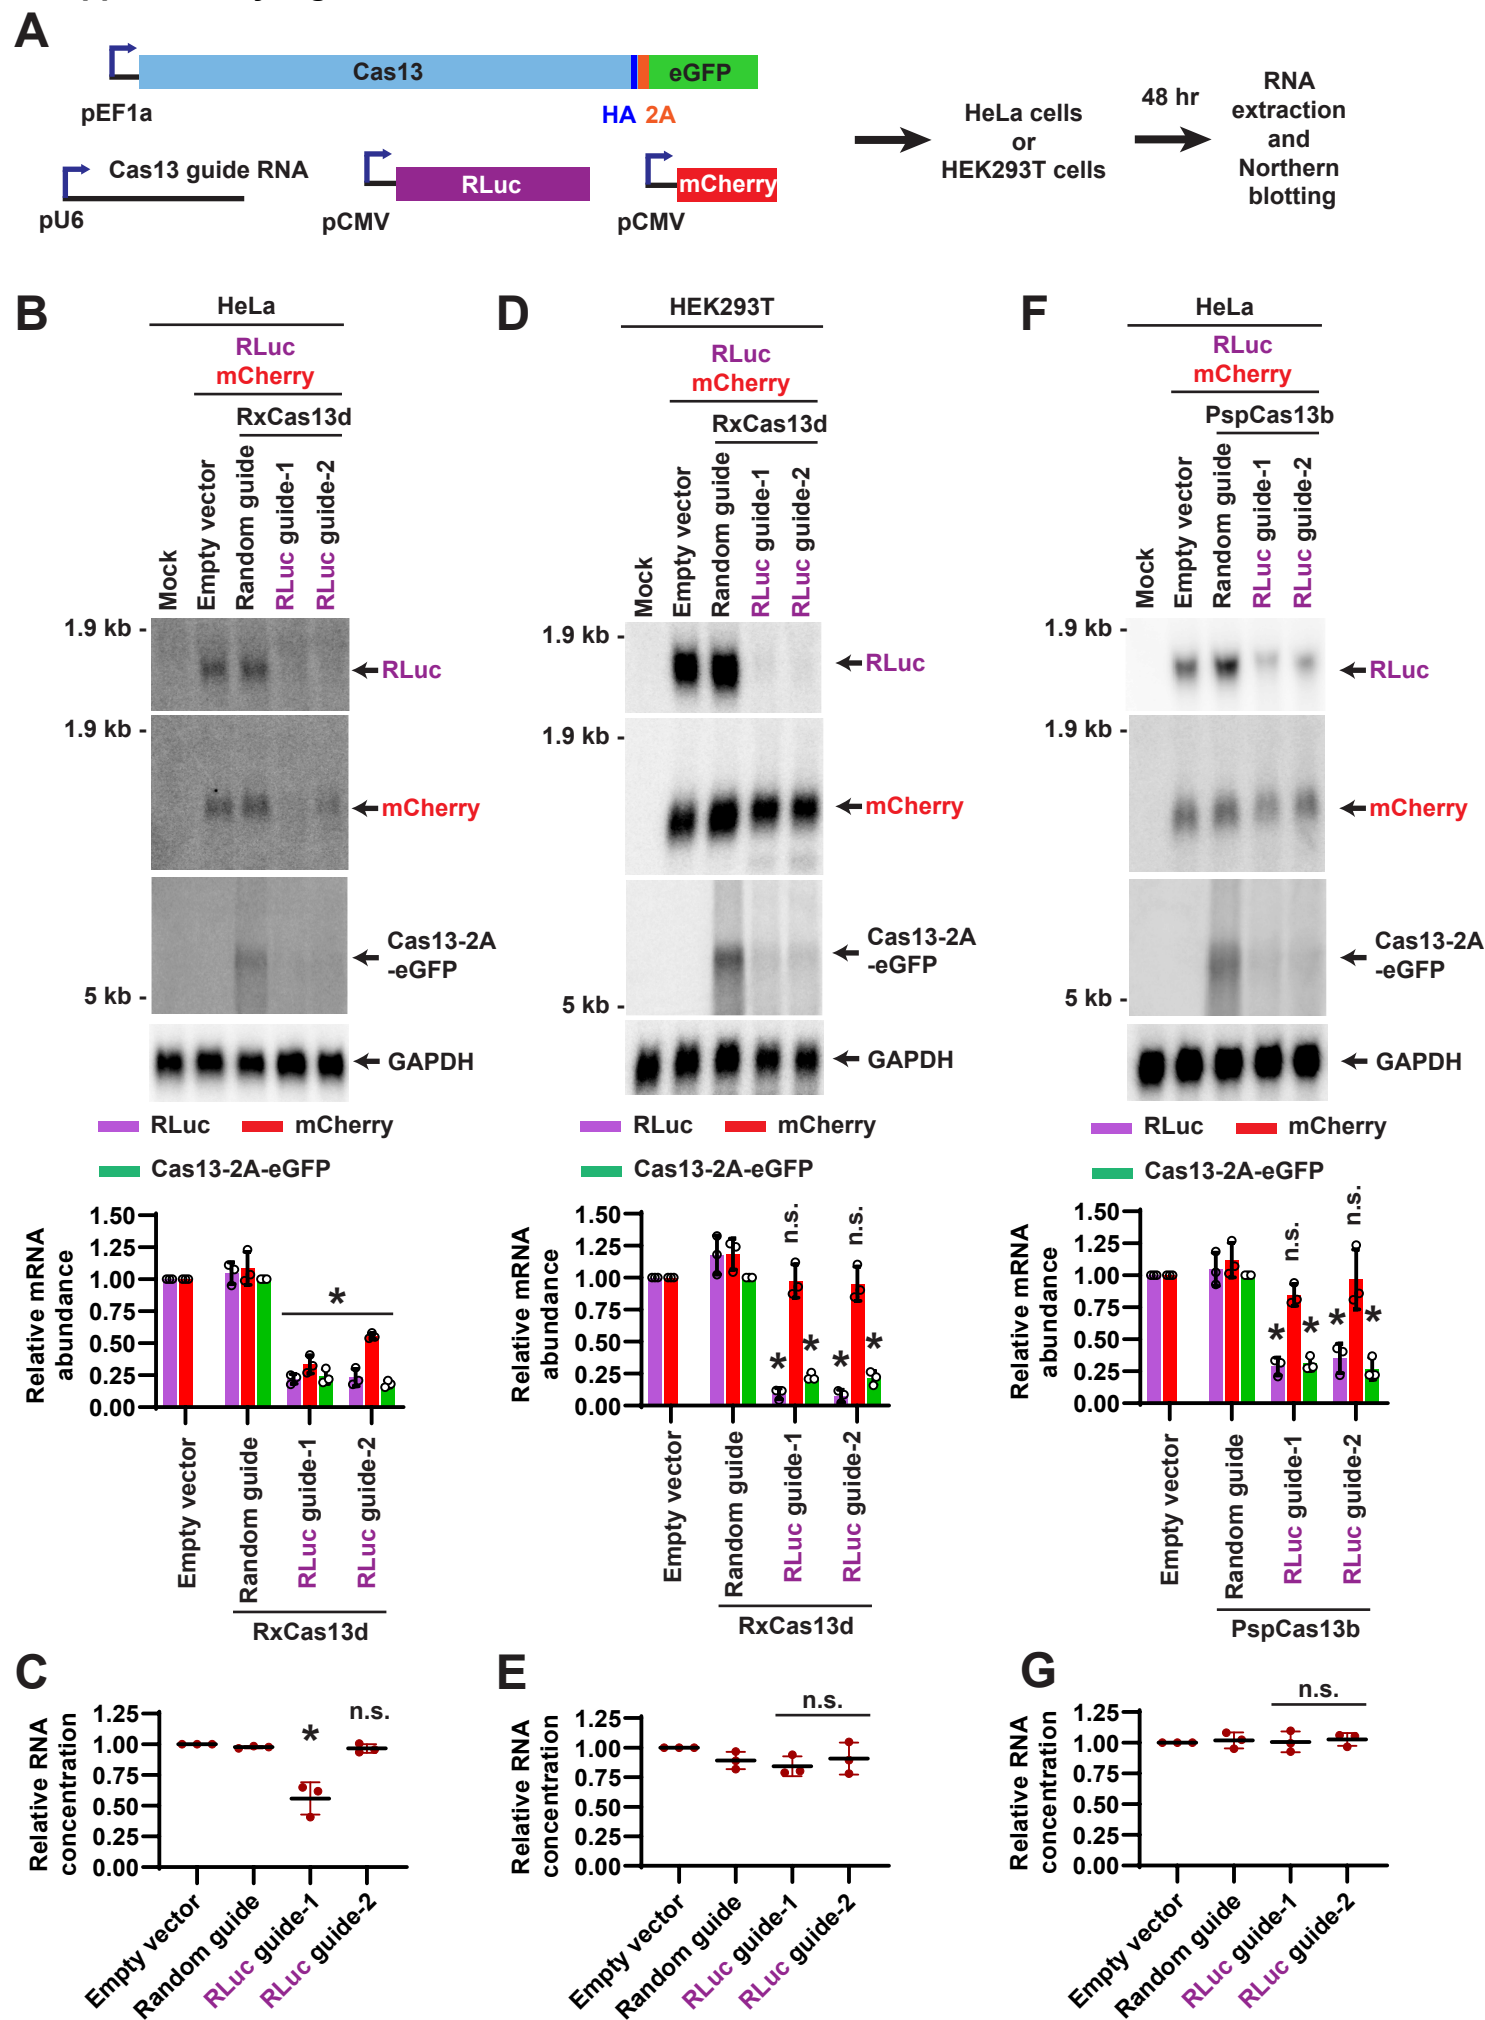

**Supplementary Figure S10. Specificity of Cas13 effectors when RLuc and mCherry were co-transfected into different human cell lines.** (A) HeLa or HEK293T cells were co-transfected with (i) 300 ng of plasmid that constitutively expresses HA-tagged Cas13 protein followed by a 2A peptide and eGFP, (ii) 200 ng of plasmid that expresses a guide RNA, (iii) 250 ng of plasmid that expresses Renilla luciferase (RLuc), and (iv) 250 ng of plasmid that expresses mCherry. 48 hr after transfection, total RNA was isolated and Northern blots performed. (B-E) RxCas13d and guide RNAs complementary to RLuc were employed in the co-transfection assay in HeLa (B,C) or HEK293T cells (D,E). (B,D) Representative Northern blots (20  $\mu$ g of total RNA/lane) are shown. ImageQuant was used to quantify the relative expression levels of RLuc, mCherry, and Cas13-2A-eGFP mRNAs. RLuc and mCherry mRNA expression was normalized to the empty vector (pBEVY-L) samples, while Cas13-2A-eGFP mRNA expression was normalized to the random guide RNA samples. GAPDH mRNA served as an endogenous loading control. Data are shown as mean  $\pm$  SD, N=3. For statistical comparisons, data were compared to the random guide RNA samples. (\*)  $P < 0.05$ . (C,E) Relative RNA concentrations obtained from the co-transfection assays in HeLa (C) and HEK293T (E) when the RxCas13d expression plasmid was used. Data are normalized to the empty vector samples and shown as mean  $\pm$  SD, N=3. (\*)  $P < 0.05$ . (F-G) PspCas13b and guide RNAs complementary to RLuc were employed in the co-transfection assay in HeLa cells as diagrammed in A. (F) Representative Northern blots (20  $\mu$ g of total RNA/lane) are shown. ImageQuant was used to quantify the relative expression levels of RLuc, mCherry, and Cas13-2A-eGFP mRNAs. RLuc and mCherry mRNA expression was normalized to the empty vector (pBEVY-L) samples, while Cas13-2A-eGFP mRNA expression was normalized to the random guide RNA samples. GAPDH mRNA served as an endogenous loading control. Data are shown as mean  $\pm$  SD, N=3. For statistical comparisons, data were compared to the random guide RNA samples. (\*)  $P < 0.05$ . (G) Relative RNA concentrations obtained from the co-transfection assays. Data are normalized to the empty vector samples and shown as mean  $\pm$  SD, N=3. No significant changes were observed.

# Supplementary Figure S11

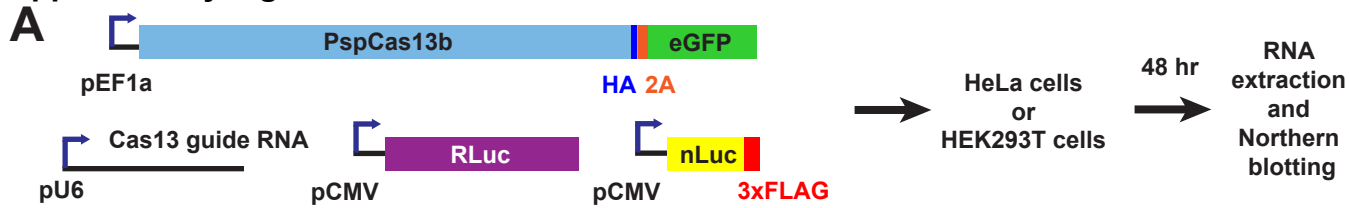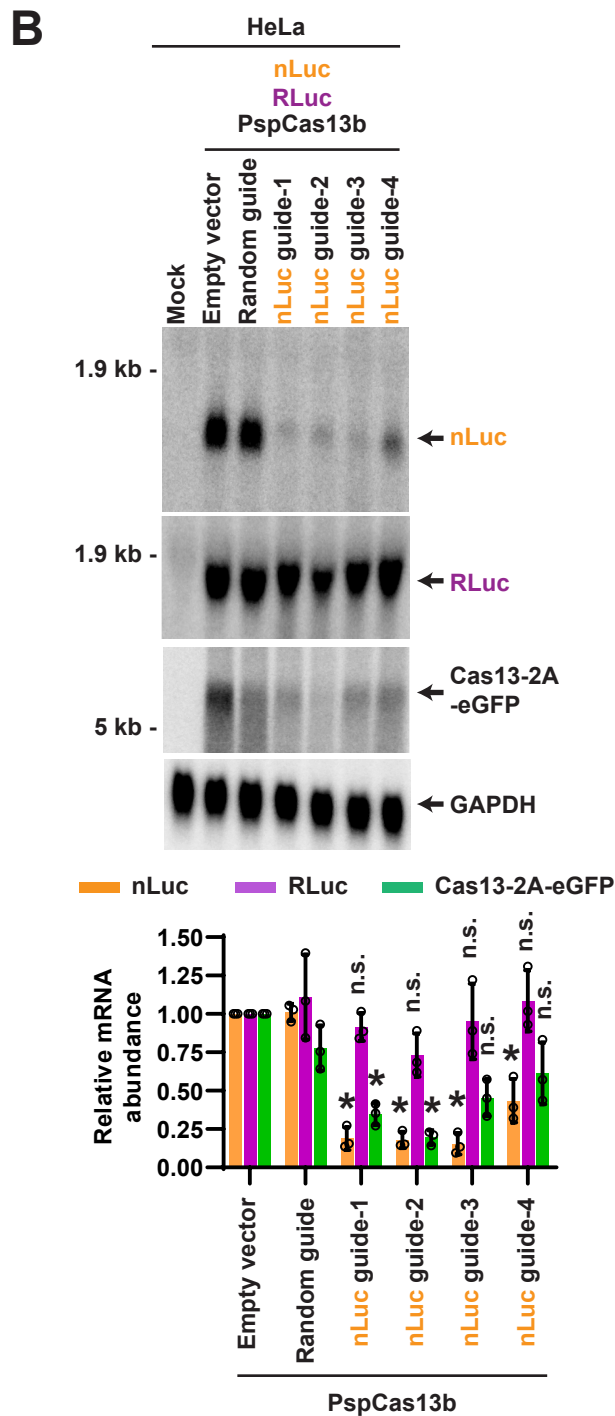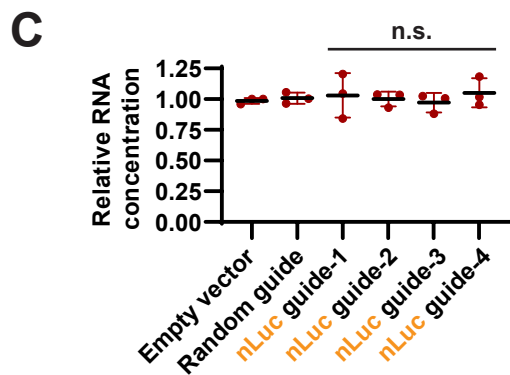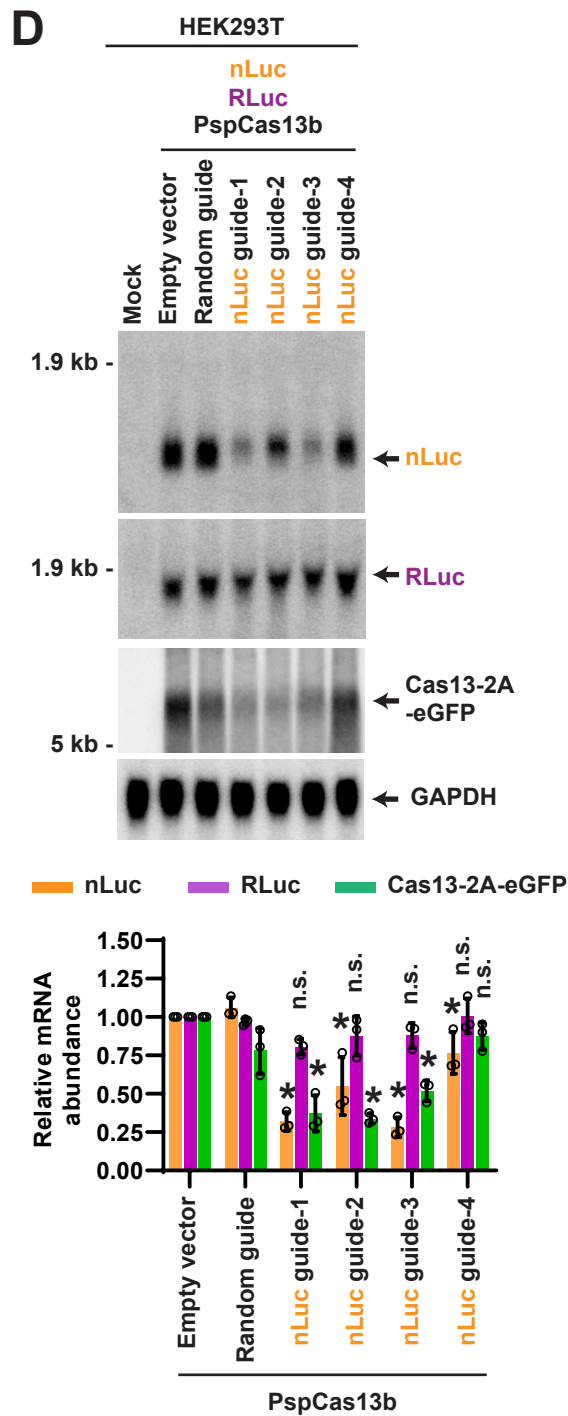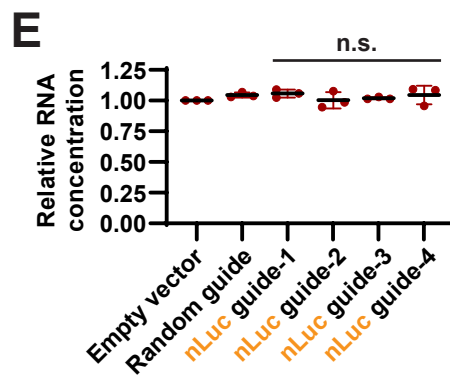

**Supplementary Figure S11. Specificity of PspCas13b when RLuc and nLuc were co-transfected into HeLa or HEK293T cells.** (A) HeLa or HEK293T cells were co-transfected with (i) 300 ng of plasmid that constitutively expresses HA-tagged PspCas13b followed by a 2A peptide and eGFP, (ii) 200 ng of plasmid that expresses a guide RNA, (iii) 250 ng of plasmid that expresses Renilla luciferase (RLuc), and (iv) 250 ng of plasmid that expresses 3xFLAG-tagged nLuc. 48 hr after transfection, total RNA was isolated and Northern blots performed. (B-E) Guide RNAs complementary to nLuc were employed in the co-transfection assay in HeLa (B-C) or HEK293T cells (D-E). (B, D) Representative Northern blots (20  $\mu$ g of total RNA/lane) are shown. ImageQuant was used to quantify the relative expression levels of RLuc, nLuc, and Cas13-2A-eGFP mRNAs. RLuc and nLuc mRNA expression was normalized to the empty vector (pBEVY-L) samples, while Cas13-2A-eGFP mRNA expression was normalized to the random guide RNA samples. GAPDH mRNA served as an endogenous loading control. Data are shown as mean  $\pm$  SD, N=3. For statistical comparisons, data were compared to the random guide RNA samples. (\*)  $P < 0.05$ . (C, E) Relative RNA concentrations obtained from the co-transfection assays. Data are normalized to the empty vector samples and shown as mean  $\pm$  SD, N=3. (\*)  $P < 0.05$ . n.s., not significant.

## SUPPLEMENTARY TABLES



**Supplementary Table S1**  
**Guide RNAs used in *Drosophila* cells**

| Cas protein | Guide RNA             | Forward primer                        | Reverse primer                        |
|-------------|-----------------------|---------------------------------------|---------------------------------------|
| RxCas13d    | Random guide (DL1)    | gaaacCGAGGGCGACTTAACCTTAGGt           | aaaaaACCTAAGGTTAAGTCGCCCTCGg          |
| RxCas13d    | Random guide (S2)     | gaaacGCAGGGTTTTCCAGTCAGGACGt          | aaaaaACGTCGTGACTGGGAAAACCTGCg         |
| RxCas13d    | eGFP guide-1          | GAAACGGATGGGCACCACCCCGGTGAACAT        | AAAAATGTTACCCGGGGTGGTCCCATCCG         |
| RxCas13d    | eGFP guide-2          | GAAACTCATGTGGTCGGGTAGCGGCTGAT         | AAAAATCAGCCGCTACCCCGACCACATGAG        |
| RxCas13d    | eGFP guide-3          | GAAACACTCCAGCTTGTGCCCCAGGATGTT        | AAAAACATCCTGGGGCACAAGCTGGAGTG         |
| RxCas13d    | eGFP guide-4          | GAAACGGGCGGACTGGGTGCTCAGGTAGTT        | AAAAAACTACCTGAGCACCCAGTCCGCCCG        |
| RxCas13d    | mCherry guide-1       | gaaacgccttggagccgtacatgaactgat        | aaaaatcagttcatgtacggctccaagggc        |
| RxCas13d    | mCherry guide-2       | gaaaccttctcgtcattacggggccgtcggat      | aaaaatccgacggccccgtaatgcagaag         |
| RxCas13d    | Laccase2 BSJ guide    | GAAACGGTAACCGTTCACGCGGTTAGGGT         | AAAAAGGGGAGCTCAGCAAAGGTACCAAAG        |
| RxCas13d    | Laccase2 Exon 2 guide | GAAACGGTAACCGTTCACGCGGTTAGGGT         | AAAAACCTAACCGTGGAAAGCGGTTACCG         |
| RxCas13d    | Laccase2 Exon 3 guide | GAAACGTCATCTAGTTTCTGTAGACCGGT         | AAAAACCGGTCACAGAAACTAGATGGAGC         |
| RxCas13d    | nLuc guide-1          | GAAACGGAGTTACGGACACCCCGAGATTCT        | AAAAAGAATCTCGGGTGTCCGTAACCTCCG        |
| RxCas13d    | nLuc guide-2          | GAAACTTCATACGGGATGATGACATGGATT        | AAAAATCCATGTCATCATCCCGTATGAA          |
| RxCas13d    | nLuc guide-3          | GAAACCGTAACCCCGTCGATTACCACTGTT        | AAAAAACACTGGTAATCGACGGGGTACCG         |
| RxCas13d    | nLuc guide-4          | GAAACAGTGATCTTTTTGCCGTCGAACAT         | AAAAATGTTTCGACGGCAAAAAGATCACTGG       |
| RxCas13d    | FFLuc guide-1         | GAAACaagctattctcgtcgcacaccacgT        | AAAAAcgtgggtgtagcagcagagaatagcttG     |
| RxCas13d    | FFLuc guide-2         | GAAACgtaactcgttgaagccgggtggcaat       | AAAAAtgcccaccggcttcaacgagtagcG        |
| RxCas13d    | FFLuc guide-3         | GAAACatagctcctcctcgaagcgggtacaT       | AAAAAtgtaccgcttcgagggaggagctatG       |
| RxCas13d    | FFLuc guide-4         | GAAACaccaccttgctcactgcgcaggcT         | AAAAAgcctggcgcagtaggcaaggtggtG        |
| RxCas13d    | eGFP guide-2 30 nt    | GAAACGCTGCTTCATGTGGTCGGGTAGCGGCTGAT   | AAAAATCAGCCGCTACCCCGACCACATGAAGCAGCG  |
| RxCas13d    | eGFP guide-3 30 nt    | GAAACAGTGTACTCCAGCTTGTGCCCCAGGATGTT   | AAAAAACATCCTGGGGCACAAGCTGGAGTACAACCTG |
| PspCas13b   | Random guide (DL1)    | cttcggagacggtCGAGGGCGACTTAACCTTAGGT   | caacACCTAAGGTTAAGTCGCCCTCGaccgtctcc   |
| PspCas13b   | Random guide (S2)     | cttcgGCAGGGTTTTCCAGTCAGGACGTTGTAAA    | caactTTACAAGCTCGTGTACTGGGAAAACCTGGCC  |
| PspCas13b   | eGFP guide-1          | cttcgGCTGCTTCATGTGGTCGGGTAGCGGCTGA    | caactCAGCCGCTACCCCGACCACATGAAGCAGCC   |
| PspCas13b   | eGFP guide-2          | cttcgGACGTAGCCTTCGGGATGGCGGACTTGAA    | caactTCAAGTCCGCATCCCGAAGGCTACGTCC     |
| PspCas13b   | eGFP guide-3          | cttcgAGTTGCGGTAGGTGGCATCGCCCTCGCCC    | caacGGGCGAGGGCGATGCCACCTACGGCAAGCTc   |
| PspCas13b   | eGFP guide-4          | cttcgCGGGCAGCTTGGCGGTGGTGCAGATGAACT   | caacAGTTTCATCTGCACCACCGGCAAGCTGCCGC   |
| PspCas13b   | eGFP guide-5          | cttcgGGGGTGTCTGTGTTAGTGGTCGGCGAG      | caacCTCGCCGACCCTACCAGCAGAACCACCCCCc   |
| PspCas13b   | mCherry guide-1       | cttcgacgttagcccttggagccgtacatgaactga  | caactcagttcatgtacggctccaagggcctacgtc  |
| PspCas13b   | mCherry guide-2       | cttcgggtcttcttctcgtcattacggggccgtcggg | caactccgacggccccgtaatgcagaagaagacc    |
| PspCas13b   | mCherry guide-3       | cttcgtcaccacgcccgcctcctcgaagttcatca   | caactgatgaacttcgaggaagcggcggctggtgac  |
| PspCas13b   | mCherry guide-4       | cttcgcttcacctttagatgaactcgcctcctg     | caaccaggacggcgagttcatetacaaggtgaagc   |
| PspCas13b   | mCherry guide-5       | cttcgtctgcttgatctcgccttcaggggcgcgt    | caacacggcggcctgaagggcgagatcaagcagac   |
| PspCas13b   | Laccase2 BSJ guide    | cttcgGATTTTGGTACCTTTGCTGAGCTCCCGGG    | caacCCCGGGGAGCTCAGCAAAGGTACCAAAATC    |
| PspCas13b   | Laccase2 Exon 2 guide | cttcgTTAGGTAACCGTTCACGCGGTTAGGGCTG    | caacCAGCCCTAACCGTGGAAAGCGGTTACCTAAC   |
| PspCas13b   | Laccase2 Exon 3 guide | cttcgAGAGTCCATCTAGTTTCTGTAGACCGGTAT   | caacATACCGGCTACAGAAACTAGATGGACTCTc    |
| PspCas13b   | nLuc guide-1          | cttcgTGGATCGGAGTTACGGACACCCCGAGATTC   | caacGAATCTCGGGTGTCCGTAACCTCCGATCCAc   |
| PspCas13b   | nLuc guide-2          | cttcgCAGACCTTCATACGGGATGATGACATGGAT   | CaacATCCATGTCATCATCCCGTATGAAGGCTGc    |
| PspCas13b   | nLuc guide-3          | cttcgGTTCCGGCGTAACCCCGTGCATTACCACTGT  | caacCACTGGTAATCGACGGGGTACCGCCGAACc    |
| PspCas13b   | nLuc guide-4          | cttcgCTGTTACAGTGATCTTTTTGCCGTCGAACA   | caactGTTTCGACGGCAAAAAGATCACTGTAAACGc  |
| PspCas13b   | FFLuc guide-1         | cttcgaaactgcaagctattctcgtcgcacaccacg  | caaccgtggtgtagcagcagagaatagcttgcagttc |
| PspCas13b   | FFLuc guide-2         | cttcggaagtcgactcgttgaagccgggtggca     | Caacttgccaccggcttcaacgagtagcagcttcc   |
| PspCas13b   | FFLuc guide-3         | cttcggcaagaatagctcctcctcgaagcgggtaca  | caactgtaccgcttcgagggagcctattcttggc    |
| PspCas13b   | FFLuc guide-4         | cttcgaagggcaccaccttgctcactgcgcaggc    | Caacgctggcgcagtaggcaaggtggtgccttc     |
| PspCas13b   | eGFP guide-1 24 nt    | cttcgTCATGTGGTCGGGTAGCGGCTGA          | caactCAGCCGCTACCCCGACCACATGAc         |
| PspCas13b   | eGFP guide-5 24 nt    | cttcgACTCCAGCTTGTGCCCCAGGATGTT        | caacACATCCTGGGGCACAAGCTGGAGTc         |
| LwaCas13a   | eGFP guide-1          | aaaacTGTTTCATGTGGTCGGGTAGCGGCTGAT     | aaaaaTCAGCCGCTACCCCGACCACATGAAGCAg    |
| LwaCas13a   | eGFP guide-2          | aaaacTTGTACTCCAGCTTGTGCCCCAGGATGTT    | aaaaaACATCCTGGGGCACAAGCTGGAGTACAAG    |
| LwaCas13a   | mCherry guide-1       | aaaacgtagcccttggagccgtacatgaactgat    | aaaaatcagttcatgtacggctccaagggcctacg   |
| LwaCas13a   | mCherry guide-2       | aaaactcttcttctcgtacattacggggccgtcggat | aaaaatccgacggccccgtaatgcagaagaagag    |

## Supplementary Table S2

### Guide RNAs used in human cells

| Cas protein | Guide RNA     | Forward primer                       | Reverse primer                        |
|-------------|---------------|--------------------------------------|---------------------------------------|
| RxCas13d    | Random guide  | aaaccGCAGGGTTTTCCAGTCACGACGTT        | aaaaaACGTCGTGACTGGGAAAACCTGCg         |
| RxCas13d    | nLuc guide-1  | AAACCGGAGTTACGGACACCCGAGATTCT        | AAAAAGAATCTCGGGGTGTCGTAACCTCCG        |
| RxCas13d    | nLuc guide-2  | AAACCTTCATACGGGATGATGACATGGATT       | AAAAAATCCATGTCATCATCCCCTATGAAG        |
| RxCas13d    | nLuc guide-3  | AAACCGTAACCCCGTCGATTACCAGTGTT        | AAAAAACACTGGTAATCGACGGGGTTACGG        |
| RxCas13d    | nLuc guide-4  | AAACCCAGTGATCTTTTTGCCGTCGAACAT       | AAAAATGTTTCGACGGCAAAAAGATCACTGG       |
| RxCas13d    | FFLuc guide-1 | AAACCaagctattctcgtgcacaccacgT        | AAAAAcgtgggtgtgcagcgagaatagcttG       |
| RxCas13d    | FFLuc guide-2 | AAACCGtactcgttgaagccgggtggcaaT       | AAAAAtgccaccggcttcaacgagtagcG         |
| RxCas13d    | FFLuc guide-3 | AAACCatagctcctcctcgaagcgttacaT       | AAAAAtgtaccgcttcgaggaggagctatG        |
| RxCas13d    | FFLuc guide-4 | AAACcaccacttgccctactgcgcccaggcT      | AAAAAgcctggcgcagtaggcaaggtgggtG       |
| RxCas13d    | RLuc guide-1  | AAACcacttaccattccgatcagatcagT        | AAAAActgatctgatcggaaatgggtaagtG       |
| RxCas13d    | RLuc guide-2  | AAACcaccaggactcgatcacgtccacgaT       | AAAAAcgtggacgtgatcagagtccctgggG       |
|             |               |                                      |                                       |
| PspCas13b   | Random guide  | caccgGCAGGGTTTTCCAGTCACGACGTTGTAAA   | caacTTTACAACGTCGTGACTGGGAAAACCTGCc    |
| PspCas13b   | nLuc guide-1  | caccgTGGATCGGAGTTACGGACACCCGAGATTTC  | caacGAATCTCGGGGTGTCGTAACCTCCGATCCAc   |
| PspCas13b   | nLuc guide-2  | caccgCAGACCTTCATACGGGATGATGACATGGAT  | CaacATCCATGTCATCATCCCGTATGAAGGTCTGc   |
| PspCas13b   | nLuc guide-3  | caccgGTTCCGGCGTAACCCCGTCGATTACCACTGT | caacCACTGGTAATCGACGGGGTTACGCCGAACc    |
| PspCas13b   | nLuc guide-4  | caccgCTGTTACAGTGATCTTTTTGCCGTCGAACA  | caacTGTTTCGACGGCAAAAAGATCACTGTAAcAGc  |
| PspCas13b   | FFLuc guide-1 | caccgaactgcaagctattctcgtgcacaccacg   | caaccgtgggtgtgcagcgagaatagcttgcagttc  |
| PspCas13b   | FFLuc guide-2 | caccggaagtgcgtactcgttgaagccgggtggcaa | Caacttgccaccggcttcaacgagtagcagcttcc   |
| PspCas13b   | FFLuc guide-3 | caccggcaagaatagctcctcctcgaagcgggtaca | caactgtaccgcttcgaggaggagctattcttgcc   |
| PspCas13b   | FFLuc guide-4 | caccgaagggcaccaccttgctactgcgccaggc   | caacgcctggcgcagtaggcaaggtgggtgcccttc  |
| PspCas13b   | RLuc guide-1  | caccgtgccggacttaccattccgatcagatcag   | caacctgatctgatcggaatgggtaagtcggcac    |
| PspCas13b   | RLuc guide-2  | caccgactcgtcccaggactcgatcacgtccacga  | caactcgtggacgtgatcagagtccctgggacgagtc |

**Supplementary Table S3**  
Northern blot probes

| Target transcript                                      | Probe sequence                   | Figure panels                                                                    |
|--------------------------------------------------------|----------------------------------|----------------------------------------------------------------------------------|
| eGFP                                                   | GTCACGAACTCCAGCAGGAC             | 1B, 1C, 2C, 4B, 4C, S3B, S4A, S4B, S4D, S6B, S8A, S8B, S8D                       |
| mCherry                                                | CGCCGGTGGAGTGGCGGCC              | 1B, 1C, 2C, 3C, 4B, 4C, S3B, S4A, S4B, S4D, S6B, S8A, S8B, S8D, S10B, S10D, S10F |
| RxCas13d                                               | CTCATTCTATCAAAGAGGCCTCAATA       | 1B, 1C, 3C, S3B                                                                  |
| PspCas13b or LwaCas13a (Complementary to HA tag)       | TCAGGCACGTCGTAGGGGTA             | 4B, 4C, S6B                                                                      |
| Rpl32                                                  | GACGCACTCTGTTGCGATACC            | 1B, 1C, 2C, 3C, 4B, 4C, 5B, S3B, S4A, S4B, S4C, S4D, S6B, S8A, S8B, S8C, S8D     |
| RxCas13d guide RNA                                     | CCCGACCAGTTGGTAGGG               | S1B                                                                              |
| PspCas13b guide RNA                                    | CCTCAAACTGGACCTCCACAAC           | S1B                                                                              |
| LwaCas13a guide RNA                                    | CCCCITCGTTTTGGGGTAGTCTAA         | S1B                                                                              |
| tRNA-val4:70BCb                                        | GTTCCGCCCGGGATCGAAC              | S1B                                                                              |
| Laccase2 minigene (Exon 2)                             | GTGTAAGATCTGGTTGATTTTGGTACCTTT   | S5B                                                                              |
| nLuc & FFLuc (Complementary to 3x FLAG)                | CGATGTCATGATCTTTATAATCACCGTCATGG | S4C, S8C, S9D                                                                    |
| nLuc                                                   | CGTAACCCCGTCGATTACCA             | 6B, 6E, 7B, 7D, S9B, S9D, S11B, S11D                                             |
| FFLuc                                                  | GCCCTTCTTGGCCTTAATGAGAATCT       | 6B, S8B, S9B, S9D                                                                |
| RLuc                                                   | GCGTCCTCTGGCTGAAGT               | 7B, 7D, S10B, S10D, S10F, S11B, S11D                                             |
| RxCas13d & PspCas13b-2A-eGFP (Complementary to HA tag) | AGCGTAATCTGGAACATCGTATGGGTA      | 6B, 6E, 7B, 7D, S9B, S10B, S10D, S10F, S11B, S11D                                |
| GAPDH                                                  | GTTGCTGTAGCAAATTCGTTGT           | 6B, 6E, 7B, 7D, S9B, S9D, S10B, S10D, S10F, S11B, S11D                           |

## Supplementary Table S4

RT-qPCR primers

| Target RNA               | Forward primer          | Reverse primer          |
|--------------------------|-------------------------|-------------------------|
| eGFP                     | CCTGAAGTTCATCTGCACCA    | AAGTCGTGCTGCTTCATGTG    |
| mCherry                  | CCTGTCCCCTCAGTTCATGT    | CCGTCCTCGAAGTTCATCAC    |
| <i>Drosophila Act42a</i> | CTCCGTCCACCATGAAGATT    | TTCGAGATCCACATCTGCTG    |
| FFLuc                    | GCAGTACCGGATTGCCCAAG    | GTCGGGGATGATCTGGTTGC    |
| Human GAPDH              | GGTGGTCTCCTCTGACTTCAACA | GTTGCTGTAGCCAAATTCGTTGT |

# Supplementary Table S5

## Full statistical analyses for titration assays

ns (not significant), \* p<0.05; \*\* p<0.01, \*\*\* p<0.001, \*\*\*\* p<0.0001

### Figure 3C: eGFP mRNA (eGFP guide-2)

| Tukey's multiple comparisons test | Mean Diff. | 95.00% CI of diff.   | Summary | Adjusted P Value |
|-----------------------------------|------------|----------------------|---------|------------------|
| 50 ng vs. 25 ng                   | -0.008231  | -0.05932 to 0.04286  | ns      | 0.982            |
| 50 ng vs. 10 ng                   | -0.03191   | -0.08300 to 0.01918  | ns      | 0.3086           |
| 50 ng vs. 5 ng                    | -0.02127   | -0.07236 to 0.02982  | ns      | 0.6578           |
| 50 ng vs. 2 ng                    | -0.06465   | -0.1157 to -0.01356  | *       | 0.013            |
| 25 ng vs. 10 ng                   | -0.02368   | -0.07477 to 0.02741  | ns      | 0.5703           |
| 25 ng vs. 5 ng                    | -0.01304   | -0.06413 to 0.03805  | ns      | 0.9118           |
| 25 ng vs. 2 ng                    | -0.05642   | -0.1075 to -0.005328 | *       | 0.0294           |
| 10 ng vs. 5 ng                    | 0.01064    | -0.04045 to 0.06173  | ns      | 0.9553           |
| 10 ng vs. 2 ng                    | -0.03274   | -0.08383 to 0.01835  | ns      | 0.2877           |
| 5 ng vs. 2 ng                     | -0.04337   | -0.09447 to 0.007715 | ns      | 0.1074           |

### Figure 3C: eGFP mRNA (eGFP guide-3)

| Tukey's multiple comparisons test | Mean Diff. | 95.00% CI of diff.  | Summary | Adjusted P Value |
|-----------------------------------|------------|---------------------|---------|------------------|
| 50 ng vs. 25 ng                   | 0.02554    | -0.04430 to 0.09537 | ns      | 0.7499           |
| 50 ng vs. 10 ng                   | -0.03679   | -0.1066 to 0.03305  | ns      | 0.4574           |
| 50 ng vs. 5 ng                    | -0.03601   | -0.1058 to 0.03383  | ns      | 0.4767           |
| 50 ng vs. 2 ng                    | -0.06428   | -0.1341 to 0.005560 | ns      | 0.075            |
| 25 ng vs. 10 ng                   | -0.06233   | -0.1322 to 0.007509 | ns      | 0.0864           |
| 25 ng vs. 5 ng                    | -0.06154   | -0.1314 to 0.008291 | ns      | 0.0914           |
| 25 ng vs. 2 ng                    | -0.08981   | -0.1596 to -0.01998 | *       | 0.0117           |
| 10 ng vs. 5 ng                    | 0.000782   | -0.06905 to 0.07062 | ns      | >0.9999          |
| 10 ng vs. 2 ng                    | -0.02749   | -0.09732 to 0.04235 | ns      | 0.6999           |
| 5 ng vs. 2 ng                     | -0.02827   | -0.09810 to 0.04157 | ns      | 0.6793           |

### Figure 3D: mCherry mRNA (Random guide)

| Tukey's multiple comparisons test | Mean Diff. | 95.00% CI of diff. | Summary | Adjusted P Value |
|-----------------------------------|------------|--------------------|---------|------------------|
| Empty vector vs. 0 ng             | 0.1339     | -0.1723 to 0.4400  | ns      | 0.7446           |
| Empty vector vs. 2 ng             | 0.1275     | -0.1786 to 0.4337  | ns      | 0.782            |
| Empty vector vs. 5 ng             | 0.113      | -0.1932 to 0.4191  | ns      | 0.8587           |
| Empty vector vs. 10 ng            | 0.2092     | -0.09699 to 0.5153 | ns      | 0.2944           |
| Empty vector vs. 25 ng            | 0.1615     | -0.1447 to 0.4676  | ns      | 0.5678           |
| Empty vector vs. 50 ng            | 0.2256     | -0.08056 to 0.5318 | ns      | 0.225            |
| 0 ng vs. 2 ng                     | -0.006333  | -0.3125 to 0.2998  | ns      | >0.9999          |
| 0 ng vs. 5 ng                     | -0.0209    | -0.3271 to 0.2853  | ns      | >0.9999          |
| 0 ng vs. 10 ng                    | 0.0753     | -0.2309 to 0.3815  | ns      | 0.976            |
| 0 ng vs. 25 ng                    | 0.0276     | -0.2786 to 0.3338  | ns      | >0.9999          |
| 0 ng vs. 50 ng                    | 0.09173    | -0.2144 to 0.3979  | ns      | 0.94             |
| 2 ng vs. 5 ng                     | -0.01457   | -0.3207 to 0.2916  | ns      | >0.9999          |
| 2 ng vs. 10 ng                    | 0.08163    | -0.2245 to 0.3878  | ns      | 0.9647           |
| 2 ng vs. 25 ng                    | 0.03393    | -0.2722 to 0.3401  | ns      | 0.9997           |

|                 |         |                   |    |         |
|-----------------|---------|-------------------|----|---------|
| 2 ng vs. 50 ng  | 0.09807 | -0.2081 to 0.4042 | ns | 0.9199  |
| 5 ng vs. 10 ng  | 0.0962  | -0.2100 to 0.4024 | ns | 0.9262  |
| 5 ng vs. 25 ng  | 0.0485  | -0.2577 to 0.3547 | ns | 0.9976  |
| 5 ng vs. 50 ng  | 0.1126  | -0.1935 to 0.4188 | ns | 0.8603  |
| 10 ng vs. 25 ng | -0.0477 | -0.3539 to 0.2585 | ns | 0.9978  |
| 10 ng vs. 50 ng | 0.01643 | -0.2897 to 0.3226 | ns | >0.9999 |
| 25 ng vs. 50 ng | 0.06413 | -0.2420 to 0.3703 | ns | 0.9893  |

**Figure 3D: RxCas13d mRNA (Random guide)**

| Tukey's multiple comparisons test | Mean Diff. | 95.00% CI of diff. | Summary | Adjusted P Value |
|-----------------------------------|------------|--------------------|---------|------------------|
| 0 ng vs. 2 ng                     | -0.03487   | -0.3933 to 0.3235  | ns      | 0.9994           |
| 0 ng vs. 5 ng                     | 0.06207    | -0.2963 to 0.4205  | ns      | 0.9904           |
| 0 ng vs. 10 ng                    | 0.01463    | -0.3438 to 0.3730  | ns      | >0.9999          |
| 0 ng vs. 25 ng                    | 0.05043    | -0.3080 to 0.4088  | ns      | 0.9963           |
| 0 ng vs. 50 ng                    | -0.207     | -0.5654 to 0.1514  | ns      | 0.4257           |
| 2 ng vs. 5 ng                     | 0.09693    | -0.2615 to 0.4553  | ns      | 0.937            |
| 2 ng vs. 10 ng                    | 0.0495     | -0.3089 to 0.4079  | ns      | 0.9966           |
| 2 ng vs. 25 ng                    | 0.0853     | -0.2731 to 0.4437  | ns      | 0.9622           |
| 2 ng vs. 50 ng                    | -0.1721    | -0.5305 to 0.1863  | ns      | 0.606            |
| 5 ng vs. 10 ng                    | -0.04743   | -0.4058 to 0.3110  | ns      | 0.9972           |
| 5 ng vs. 25 ng                    | -0.01163   | -0.3700 to 0.3468  | ns      | >0.9999          |
| 5 ng vs. 50 ng                    | -0.269     | -0.6274 to 0.08936 | ns      | 0.1922           |
| 10 ng vs. 25 ng                   | 0.0358     | -0.3226 to 0.3942  | ns      | 0.9993           |
| 10 ng vs. 50 ng                   | -0.2216    | -0.5800 to 0.1368  | ns      | 0.3588           |
| 25 ng vs. 50 ng                   | -0.2574    | -0.6158 to 0.1010  | ns      | 0.2259           |

**Figure 3D: mCherry mRNA (eGFP guide-2)**

| Tukey's multiple comparisons test | Mean Diff. | 95.00% CI of diff. | Summary | Adjusted P Value |
|-----------------------------------|------------|--------------------|---------|------------------|
| random vs. 0 ng                   | -0.0484    | -0.2995 to 0.2027  | ns      | 0.9968           |
| random vs. 2 ng                   | 0.1311     | -0.1200 to 0.3822  | ns      | 0.624            |
| random vs. 5 ng                   | 0.2857     | 0.03463 to 0.5368  | *       | 0.0201           |
| random vs. 10 ng                  | 0.4173     | 0.1662 to 0.6684   | ***     | 0.0006           |
| random vs. 25 ng                  | 0.547      | 0.2959 to 0.7981   | ****    | <0.0001          |
| random vs. 50 ng                  | 0.5841     | 0.3330 to 0.8352   | ****    | <0.0001          |
| 0 ng vs. 2 ng                     | 0.1795     | -0.07157 to 0.4306 | ns      | 0.2722           |
| 0 ng vs. 5 ng                     | 0.3341     | 0.08303 to 0.5852  | **      | 0.0055           |
| 0 ng vs. 10 ng                    | 0.4657     | 0.2146 to 0.7168   | ***     | 0.0002           |
| 0 ng vs. 25 ng                    | 0.5954     | 0.3443 to 0.8465   | ****    | <0.0001          |
| 0 ng vs. 50 ng                    | 0.6325     | 0.3814 to 0.8836   | ****    | <0.0001          |
| 2 ng vs. 5 ng                     | 0.1546     | -0.09650 to 0.4057 | ns      | 0.4367           |
| 2 ng vs. 10 ng                    | 0.2862     | 0.03510 to 0.5373  | *       | 0.0199           |
| 2 ng vs. 25 ng                    | 0.4159     | 0.1648 to 0.6670   | ***     | 0.0006           |
| 2 ng vs. 50 ng                    | 0.4529     | 0.2018 to 0.7040   | ***     | 0.0002           |
| 5 ng vs. 10 ng                    | 0.1316     | -0.1195 to 0.3827  | ns      | 0.6202           |
| 5 ng vs. 25 ng                    | 0.2613     | 0.01016 to 0.5124  | *       | 0.0384           |
| 5 ng vs. 50 ng                    | 0.2983     | 0.04723 to 0.5494  | *       | 0.0144           |
| 10 ng vs. 25 ng                   | 0.1297     | -0.1214 to 0.3808  | ns      | 0.636            |
| 10 ng vs. 50 ng                   | 0.1667     | -0.08437 to 0.4178 | ns      | 0.3507           |
| 25 ng vs. 50 ng                   | 0.03707    | -0.2140 to 0.2882  | ns      | 0.9994           |

**Figure 3D: RxCas13d mRNA (eGFP guide-2)**

| Tukey's multiple comparisons test | Mean Diff. | 95.00% CI of diff.  | Summary | Adjusted P Value |
|-----------------------------------|------------|---------------------|---------|------------------|
| random vs. 0 ng                   | -0.1144    | -0.5221 to 0.2932   | ns      | 0.9552           |
| random vs. 2 ng                   | -0.1176    | -0.5253 to 0.2901   | ns      | 0.9493           |
| random vs. 5 ng                   | 0.3192     | -0.08846 to 0.7269  | ns      | 0.1762           |
| random vs. 10 ng                  | 0.4062     | -0.001491 to 0.8138 | ns      | 0.0511           |
| random vs. 25 ng                  | 0.6398     | 0.2321 to 1.047     | **      | 0.0015           |
| random vs. 50 ng                  | 0.6586     | 0.2510 to 1.066     | **      | 0.0011           |
| 0 ng vs. 2 ng                     | -0.003167  | -0.4108 to 0.4045   | ns      | >0.9999          |
| 0 ng vs. 5 ng                     | 0.4336     | 0.02598 to 0.8413   | *       | 0.0338           |
| 0 ng vs. 10 ng                    | 0.5206     | 0.1129 to 0.9283    | **      | 0.009            |
| 0 ng vs. 25 ng                    | 0.7542     | 0.3465 to 1.162     | ***     | 0.0003           |
| 0 ng vs. 50 ng                    | 0.7731     | 0.3654 to 1.181     | ***     | 0.0002           |
| 2 ng vs. 5 ng                     | 0.4368     | 0.02914 to 0.8445   | *       | 0.0323           |
| 2 ng vs. 10 ng                    | 0.5238     | 0.1161 to 0.9314    | **      | 0.0086           |
| 2 ng vs. 25 ng                    | 0.7574     | 0.3497 to 1.165     | ***     | 0.0003           |
| 2 ng vs. 50 ng                    | 0.7762     | 0.3686 to 1.184     | ***     | 0.0002           |
| 5 ng vs. 10 ng                    | 0.08697    | -0.3207 to 0.4946   | ns      | 0.9882           |
| 5 ng vs. 25 ng                    | 0.3206     | -0.08709 to 0.7282  | ns      | 0.173            |
| 5 ng vs. 50 ng                    | 0.3394     | -0.06822 to 0.7471  | ns      | 0.1339           |
| 10 ng vs. 25 ng                   | 0.2336     | -0.1741 to 0.6413   | ns      | 0.479            |
| 10 ng vs. 50 ng                   | 0.2525     | -0.1552 to 0.6601   | ns      | 0.3952           |
| 25 ng vs. 50 ng                   | 0.01887    | -0.3888 to 0.4265   | ns      | >0.9999          |

**Figure 3D: mCherry mRNA (eGFP guide-3)**

| Tukey's multiple comparisons test | Mean Diff. | 95.00% CI of diff.  | Summary | Adjusted P Value |
|-----------------------------------|------------|---------------------|---------|------------------|
| random vs. 0 ng                   | 0.07227    | -0.1940 to 0.3385   | ns      | 0.9769           |
| random vs. 2 ng                   | 0.2298     | -0.03641 to 0.4961  | ns      | 0.118            |
| random vs. 5 ng                   | 0.2594     | -0.006840 to 0.5256 | ns      | 0.059            |
| random vs. 10 ng                  | 0.3708     | 0.1045 to 0.6370    | **      | 0.0036           |
| random vs. 25 ng                  | 0.5342     | 0.2680 to 0.8004    | ****    | <0.0001          |
| random vs. 50 ng                  | 0.655      | 0.3887 to 0.9212    | ****    | <0.0001          |
| 0 ng vs. 2 ng                     | 0.1576     | -0.1087 to 0.4238   | ns      | 0.4826           |
| 0 ng vs. 5 ng                     | 0.1871     | -0.07911 to 0.4534  | ns      | 0.2896           |
| 0 ng vs. 10 ng                    | 0.2985     | 0.03226 to 0.5647   | *       | 0.0225           |
| 0 ng vs. 25 ng                    | 0.4619     | 0.1957 to 0.7282    | ***     | 0.0004           |
| 0 ng vs. 50 ng                    | 0.5827     | 0.3165 to 0.8489    | ****    | <0.0001          |
| 2 ng vs. 5 ng                     | 0.02957    | -0.2367 to 0.2958   | ns      | >0.9999          |
| 2 ng vs. 10 ng                    | 0.1409     | -0.1253 to 0.4072   | ns      | 0.6093           |
| 2 ng vs. 25 ng                    | 0.3044     | 0.03813 to 0.5706   | *       | 0.0194           |
| 2 ng vs. 50 ng                    | 0.4251     | 0.1589 to 0.6914    | ***     | 0.0009           |
| 5 ng vs. 10 ng                    | 0.1114     | -0.1549 to 0.3776   | ns      | 0.8224           |
| 5 ng vs. 25 ng                    | 0.2748     | 0.008560 to 0.5410  | *       | 0.0405           |
| 5 ng vs. 50 ng                    | 0.3956     | 0.1293 to 0.6618    | **      | 0.0019           |
| 10 ng vs. 25 ng                   | 0.1634     | -0.1028 to 0.4297   | ns      | 0.4401           |
| 10 ng vs. 50 ng                   | 0.2842     | 0.01796 to 0.5504   | *       | 0.0321           |
| 25 ng vs. 50 ng                   | 0.1208     | -0.1455 to 0.3870   | ns      | 0.7602           |

**Figure 3D: RxCas13d mRNA (eGFP guide-3)**

| Tukey's multiple comparisons test | Mean Diff. | 95.00% CI of diff. | Summary | Adjusted P Value |
|-----------------------------------|------------|--------------------|---------|------------------|
|-----------------------------------|------------|--------------------|---------|------------------|

|                  |          |                    |      |         |
|------------------|----------|--------------------|------|---------|
| random vs. 0 ng  | 0.2312   | -0.1010 to 0.5634  | ns   | 0.2765  |
| random vs. 2 ng  | 0.4231   | 0.09092 to 0.7553  | **   | 0.0092  |
| random vs. 5 ng  | 0.3963   | 0.06406 to 0.7285  | *    | 0.0152  |
| random vs. 10 ng | 0.4941   | 0.1619 to 0.8263   | **   | 0.0025  |
| random vs. 25 ng | 0.59     | 0.2578 to 0.9222   | ***  | 0.0005  |
| random vs. 50 ng | 0.6841   | 0.3519 to 1.016    | **** | <0.0001 |
| 0 ng vs. 2 ng    | 0.1919   | -0.1403 to 0.5241  | ns   | 0.4703  |
| 0 ng vs. 5 ng    | 0.165    | -0.1672 to 0.4972  | ns   | 0.6289  |
| 0 ng vs. 10 ng   | 0.2629   | -0.06934 to 0.5951 | ns   | 0.1684  |
| 0 ng vs. 25 ng   | 0.3587   | 0.02652 to 0.6909  | *    | 0.0306  |
| 0 ng vs. 50 ng   | 0.4528   | 0.1206 to 0.7850   | **   | 0.0053  |
| 2 ng vs. 5 ng    | -0.02687 | -0.3591 to 0.3053  | ns   | >0.9999 |
| 2 ng vs. 10 ng   | 0.07097  | -0.2612 to 0.4032  | ns   | 0.9881  |
| 2 ng vs. 25 ng   | 0.1668   | -0.1654 to 0.4990  | ns   | 0.6181  |
| 2 ng vs. 50 ng   | 0.2609   | -0.07128 to 0.5931 | ns   | 0.1738  |
| 5 ng vs. 10 ng   | 0.09783  | -0.2344 to 0.4300  | ns   | 0.9444  |
| 5 ng vs. 25 ng   | 0.1937   | -0.1385 to 0.5259  | ns   | 0.4602  |
| 5 ng vs. 50 ng   | 0.2878   | -0.04441 to 0.6200 | ns   | 0.1105  |
| 10 ng vs. 25 ng  | 0.09587  | -0.2363 to 0.4281  | ns   | 0.9492  |
| 10 ng vs. 50 ng  | 0.19     | -0.1422 to 0.5222  | ns   | 0.4813  |
| 25 ng vs. 50 ng  | 0.0941   | -0.2381 to 0.4263  | ns   | 0.9533  |

**Figure 6D: FFLuc mRNA (FFLuc guide-1)**

| Tukey's multiple comparisons test | Mean Diff. | 95.00% CI of diff. | Summary | Adjusted P Value |
|-----------------------------------|------------|--------------------|---------|------------------|
| 150 ng vs. 50 ng                  | -0.05945   | -0.3725 to 0.2536  | ns      | 0.9267           |
| 150 ng vs. 20 ng                  | -0.2568    | -0.5698 to 0.05633 | ns      | 0.1127           |
| 50 ng vs. 20 ng                   | -0.1973    | -0.5104 to 0.1158  | ns      | 0.2579           |

**Figure 6D: FFLuc mRNA (FFLuc guide-4)**

| Tukey's multiple comparisons test | Mean Diff. | 95.00% CI of diff. | Summary | Adjusted P Value |
|-----------------------------------|------------|--------------------|---------|------------------|
| 150 ng vs. 50 ng                  | -0.1122    | -0.4961 to 0.2717  | ns      | 0.7874           |
| 150 ng vs. 20 ng                  | -0.2991    | -0.6830 to 0.08484 | ns      | 0.1354           |
| 50 ng vs. 20 ng                   | -0.1869    | -0.5708 to 0.1970  | ns      | 0.4502           |

**Figure 6E: nLuc mRNA (Random guide)**

| Tukey's multiple comparisons test | Mean Diff. | 95.00% CI of diff. | Summary | Adjusted P Value |
|-----------------------------------|------------|--------------------|---------|------------------|
| 0 ng vs. 20 ng                    | -0.08253   | -0.4622 to 0.2971  | ns      | 0.9998           |
| 0 ng vs. 50 ng                    | -0.0099    | -0.3895 to 0.3697  | ns      | >0.9999          |
| 0 ng vs. 150 ng                   | -0.04517   | -0.4248 to 0.3345  | ns      | >0.9999          |
| 20 ng vs. 50 ng                   | 0.07263    | -0.3070 to 0.4523  | ns      | >0.9999          |
| 20 ng vs. 150 ng                  | 0.03737    | -0.3423 to 0.4170  | ns      | >0.9999          |
| 50 ng vs. 150 ng                  | -0.03527   | -0.4149 to 0.3444  | ns      | >0.9999          |

**Figure 6E: RxCas13d mRNA (Random guide)**

| Tukey's multiple comparisons test | Mean Diff. | 95.00% CI of diff. | Summary | Adjusted P Value |
|-----------------------------------|------------|--------------------|---------|------------------|
| 0 ng vs. 20 ng                    | -0.1916    | -0.5599 to 0.1767  | ns      | 0.7624           |
| 0 ng vs. 50 ng                    | 0.07003    | -0.2983 to 0.4383  | ns      | 0.9999           |
| 0 ng vs. 150 ng                   | -0.0031    | -0.3714 to 0.3652  | ns      | >0.9999          |
| 20 ng vs. 50 ng                   | 0.2616     | -0.1067 to 0.6299  | ns      | 0.3522           |



|                  |          |                   |    |        |
|------------------|----------|-------------------|----|--------|
| 20 ng vs. 150 ng | 0.1885   | -0.1798 to 0.5568 | ns | 0.7791 |
| 50 ng vs. 150 ng | -0.07313 | -0.4414 to 0.2952 | ns | 0.9998 |

#### Figure 6E: nLuc mRNA (FFLuc guide-1)

| Tukey's multiple comparisons test | Mean Diff. | 95.00% CI of diff.  | Summary | Adjusted P Value |
|-----------------------------------|------------|---------------------|---------|------------------|
| 0 ng vs. 20 ng                    | 0.2029     | -0.07829 to 0.4841  | ns      | 0.1994           |
| 0 ng vs. 50 ng                    | 0.4755     | 0.1943 to 0.7567    | **      | 0.0017           |
| 0 ng vs. 150 ng                   | 0.6615     | 0.3803 to 0.9427    | ***     | 0.0001           |
| 20 ng vs. 50 ng                   | 0.2726     | -0.008560 to 0.5538 | ns      | 0.0584           |
| 20 ng vs. 150 ng                  | 0.4586     | 0.1774 to 0.7398    | **      | 0.0023           |
| 50 ng vs. 150 ng                  | 0.1859     | -0.09526 to 0.4671  | ns      | 0.2629           |

#### Figure 6E: RxCas13d mRNA (FFLuc guide-1)

| Tukey's multiple comparisons test | Mean Diff. | 95.00% CI of diff. | Summary | Adjusted P Value |
|-----------------------------------|------------|--------------------|---------|------------------|
| 0 ng vs. 20 ng                    | 0.143      | -0.1487 to 0.4346  | ns      | 0.5217           |
| 0 ng vs. 50 ng                    | 0.5536     | 0.2619 to 0.8453   | ***     | 0.0007           |
| 0 ng vs. 150 ng                   | 0.7727     | 0.4810 to 1.064    | ****    | <0.0001          |
| 20 ng vs. 50 ng                   | 0.4106     | 0.1190 to 0.7023   | **      | 0.0065           |
| 20 ng vs. 150 ng                  | 0.6297     | 0.3381 to 0.9214   | ***     | 0.0002           |
| 50 ng vs. 150 ng                  | 0.2191     | -0.07258 to 0.5108 | ns      | 0.1733           |

#### Figure 6E: nLuc mRNA (FFLuc guide-4)

| Tukey's multiple comparisons test | Mean Diff. | 95.00% CI of diff. | Summary | Adjusted P Value |
|-----------------------------------|------------|--------------------|---------|------------------|
| 0 ng vs. 20 ng                    | 0.09387    | -0.2573 to 0.4450  | ns      | 0.898            |
| 0 ng vs. 50 ng                    | 0.3258     | -0.02533 to 0.6769 | ns      | 0.0722           |
| 0 ng vs. 150 ng                   | 0.5286     | 0.1775 to 0.8798   | **      | 0.004            |
| 20 ng vs. 50 ng                   | 0.2319     | -0.1192 to 0.5831  | ns      | 0.2637           |
| 20 ng vs. 150 ng                  | 0.4348     | 0.08363 to 0.7859  | *       | 0.0149           |
| 50 ng vs. 150 ng                  | 0.2028     | -0.1483 to 0.5540  | ns      | 0.3754           |

#### Figure 6E: RxCas13d mRNA (FFLuc guide-4)

| Tukey's multiple comparisons test | Mean Diff. | 95.00% CI of diff. | Summary | Adjusted P Value |
|-----------------------------------|------------|--------------------|---------|------------------|
| 0 ng vs. 20 ng                    | 0.3321     | 0.09078 to 0.5734  | **      | 0.0075           |
| 0 ng vs. 50 ng                    | 0.6583     | 0.4170 to 0.8996   | ****    | <0.0001          |
| 0 ng vs. 150 ng                   | 0.8895     | 0.6482 to 1.131    | ****    | <0.0001          |
| 20 ng vs. 50 ng                   | 0.3263     | 0.08498 to 0.5676  | **      | 0.0085           |
| 20 ng vs. 150 ng                  | 0.5575     | 0.3162 to 0.7988   | ***     | 0.0001           |
| 50 ng vs. 150 ng                  | 0.2312     | -0.01009 to 0.4725 | ns      | 0.0619           |

## SUPPLEMENTARY METHODS

The following *Drosophila* expression plasmids were each generated from the previously published pUb 3xFLAG MCS plasmid (Chen et al. (2012) *RNA*, **18**, 2148-2156.) using the three steps outlined below.

**pUb RxCas13d + RxCas13d guide RNA (Addgene #176303)**

**pUb dRxCas13d + RxCas13d guide RNA (Addgene #176304)**

**pUb PspCas13b + PspCas13b guide RNA (Addgene #176305)**

**pUb dPspCas13b + PspCas13b guide RNA (Addgene #176306)**

**pUb LwaCas13a + LwaCas13a guide RNA (Addgene #176307)**

The full plasmid sequence of pUb 3xFLAG MCS is as follows:

```
GACGAAAGGGCCCTCGTGATACGCCATTTTTATAGGTTAAATGTCATGATAAATAGTTTCTTAGACGTCAGGTGGCACTTTTCGGGGAAATGTGCG
CGGAACCCCTATTTGTTTATTTTTCTAAATACATTCAAATATGTATCCGCTCATGAGACAATAACCCGTGATAAATGCTTCAATAATATGAAAAAGG
AAGAGTATGAGTATTCACATTCCCGTGTCCGCTTATTCCTTTTTGCGGCATTTTGCCTTCCTGTTTTGCTCACCCAGAAACGCTGGTGAAG
TAAAAGATGCTGAAGATCAGTTGGGTGCACGAGTGGGTTACATCGAATGGATCTCAACAGCGGTAAGATCCTTGAGAGTTTTTCGCCCCGAA
TTTTTCAATGATGAGCACTTTTAAAGTTCTGCTATGTGGCGGGTATTATCCCGTATTGACGCCGGCAAGAGCAACTCGGTCCGCGCATACACTAT
TCTCAGAATGACTTGGTTGAGTACTCACCAGTCACAGAAAAGCATCTACGGATGGCATGACAGTAAGAGAATTATGCAGTGCCTGCCATAACCATGA
GTGATAACACTGCGGCCAACTTACTTCTGACAAACGATCGGAGGACCGAAGGAGCTAACCGCTTTTTGACAAACATGGGGGATCATGTAACCGCCT
TGATCGTTGGGAACCGGAGCTGAATGAAGCCATACCAAACGACGAGCGTGACACCAGATGCCTGTAGCAATGGCAACACGTTGCGCAAACATATTA
ACTGGCGAACTACTTACTCTAGCTTCCCGGCAACAATAATAGACTGGATGGAGGCGGATAAAGTTGCAGGACCCTTCTGCGCTCGGCCCTCCGG
CTGGCTGGTTTTATGCTGATAAATCTGGAGCCGGTGAGCGTGGGTCTCGCGGTATCATTGCAGCACTGGGGCCAGATGGTAAGCCCTCCCGTATCGT
AGTTATCTACACGACGGGAGTCAAGCAACTATGGATGAACGAAATAGACAGATCGTGGAGTAGGTGCCTCACTGATTAAGCATTGGTAACGTGTC
GACCAAGTTTACTCATATATACTTTAGATTGATTTAAACTTCATTTTTTAATTTAAAGGATCTAGGTGAAGATCCTTTTTGATAATCTCATGACCA
AAATCCCTAACGTGAGTTTTCGTTCCTGAGCGTCAGACCCGTAGAAAAGATCAAAGGATCTTCTTGAGATCCTTTTTTCTGCGCGTAATCTG
CTGCTTGCAAAACAAAAAACCACCGCTACCAGCGGTGGTTTTGTTGCGCGATCAAGAGCTACCAACTTTTTTCCGAGGTAAGTGGCTTCCAGCA
GCGCAGATACCAAACTGTTCTTCTAGTGTAGCCGTAGTTAGGCCACCCTCAAGAACTCTGTAGCACCAGCTACATACCTCGCTCTGTAATCC
TGTTACCAAGTGGCTGCTGCCAGTGGCGATAAGTGTGTTCTTACCAGGTTGGACTCAAGACGATAGTTACCGGATAAGGCGCAGCGGTCCGGCTGAAC
GGGGGTTCTGTCACACAGCCAGCTTGGAGCGAAGCAGCTACACCGAATGAGATACCTACAGCGTGAAGTATGAGAAAGCGCCACGCTTCCCGAA
GGGAGAAAGCGGACAGGTATCCGGTAAGCGGCAGGGTCGGAACAGGAGAGCGCACGAGGGAGCTTCCAGGGGAAACGCCTGGTATCTTTATAGTC
CTGTCGGGTTTTCGCCACCTCTGACTTGAGCGTGCATTTTTGTGATGCTCGTCAAGGGGGCGGAGCCTATGAAAAACGCCAGCAACCGCGCCTTTTT
ACGGTTCCTGGCCTTTTTGCTGGCCTTTTTGCTCACATGTTCTTTCCTGCGTTATCCCTGATTTCTGTGGATAACCGTATTACCGCCTTTGAGTGA
GATACCGCTCGCCGACGCCAAGCAGCCGAGCGCAGGAGTCACTGAGCGAGGAAGCGGAAGAGCGCCAATACGCAAAACCGCCTCTCCCGCGCGTT
GGCCGATTAATGATGACAGCAGCAGGTTTTCCGACTGGAAAAGCGGAGTGAAGCAGCAACGCAATTAATGTGAGTTAGCTACTCATTAGGC
ACCCAGGCTTTACACTTTATGCTTCCGGCTCGTATGTTGTGTTGAAATTTGTGAGCGGATAACAATTTACACAGGAAACAGCTATGACCATGATTAC
GCCAAGCTTGTGCGCGAAGCAGCAGCAGAGATTCCAATGTGTCGATATCTTTCAGGCTTTTGCCTTCAGTTCCAGACGAAAGCGACTGGCGATT
CGCGTGTGGGCTCTGCTTCAGGGTCTTGTGAATTAGGGCGCGCAGATCGCCGATGGGCGTGGCGCGGAGGGCACCTTCACCTTCCCGTACGGCTTG
CTGTTCTTCGCGTTCAAAATCTCCAGCTCCATTTTGTCTTTCGGTGGCTTGAATCAGTACTGTCCAAAATCGAAAATCGCCGAACCGTAGTGTGAC
CGTGGGGGCTCTGCGAAAATAAACTTTTTTAGGTATATGGCCACACCGGGAAAGCAGTGGATTATATGTTTTAATATAAATATGACAGGTT
TTCATTACTTATCCAGATGTAAGCCCACTTAAAGCGATTTAAACAATTTTGGCGAAAGAGTATAAACAATTTCACTTAAAATGGATTAAAGAAA
GCTAGCTTGTGTAAGATTATGCGCAGCGTTGCCAGATAGCTCCATTTAAAACACTTCAAAAACAATAAGTTTTGAAAATATAATACATAAATAGCAGT
CGTTGCCGCAACGCTCAACACATCACACTTTTTAAAACACCCTTACCTTACACAGAATTACTTTTAAATTTCCAGTCAAGCTGCGAGTTTCAAATTT
ATAGCCGGTAGAGAAGACAGTGCATTTCAAAGCAAACTAACAGGGTCTTAAATTTCAAAAACCAATCCTAACAGCTTTGGACTTTTGTAAAGT
TTAGATCAAAGGTGGCATGCTCAATGTCATGGTAAGAAGTAGTGCCTTAGTGAATAAATCCTCATTCAGCCGGTCAAGTCACTAGCAGAGAAGGT
CTCAATTTGAAATTTGCTTAAAATAATTTATGTTTTGTACTGTGGTGGAGTTTAAACGAAAAACCAAAAAAAGTGATACACAGAAATCATAAA
AAATTTAATAACAAGGTATTCGTACGTATCAAAAACATTTTCGGCACAAATTTTTTCTCTGTACTAAAGTGTACGAACACTACGGTATTTTTTAGT
GATTTTCAACGGACCCGAAGGTATATAAACAGCGTTCCGCAACGGTGCCTTCAAAAACAATTTGACATTTGCAGCAGCAAGTACAAGTAGAAAAGTA
AAGCGCAATCAGCGAAAAATTTATACCTAATTTGTTGGTGAATTAAGTACAATTTAAAGAAACATTTCTCGAAAGTCAACAGAAACGTAAGTTTTAACT
CGCTGTTACCAATTAGTAATAAGAGCAACAAGACGTTGAGTAAATTCAGAAAACACTGCATTTCAAGGTCTTTGTTCCGGCATTTTTTTTTATTCAA
CGCTCTACGTAATTTCAAAAATAAGAAAATTTGGCAGCCAGCATCTGTTTTCCCAATGAATTTGGCATCAAAAACGCAAAACAAATCTATAAATAAACTT
CGGTGTTGATTTTCGCCAAGATTTATTGGCAAAATTTGTAATTTGCAAGTACGCAATTTGAAAATTTGAGAAATTCAGAAATTCAGAACGCACTCGATCGAGCATT
TGTGTGCATGTTATTAGTTAGTTGTTTGTGTTAATTGAAGTATTTTACCAACGAAATCCACTTATTTTTAGCTGAAATAGAGTAGGTTGCTTAAACAA
AGCCACGTTCTGAAAATTTCTTATTGCTTGTAGTTGTGACGTCACCATATACACAAAATAAATGTTGATGCAATGTCATTTTCAGTGTGTATATATACA
```

TGCACACACTCGCAACACGAAAACGATGACGAAGCAACGGAACAAAGGTTTCTCAACTACCCTTTGTTCCCTGTTTCTTCGCTTTCCTTTGTTCCAA  
TATTTCGTAGAGGGTTAATAGGGGTTTCTCAACAAAGTTGGCGTCGATAAATAAGTTTCCCATTTTATTTCCCGAGCCAGGAAGTTAGTTTCAATAGT  
TTTGTAATTTCAACGAACTCATTTGATTTCTGACTAATTTCCACATCTCTATTTTCTTCCCGCAGAATAATCCAAACTGCAGGTCGACTCTAGCT  
AGAGGAAGCTTATGGACTACAAAGACCATGACGGTGATTATAAAGATCATGATATCGATTACAAGGATGACGATGACAAGGATCCACTAGTCCAGTG  
TGGTGAATTCTCGAGATATCCAGCACAGTGGCGGCCGCTCGAGTCTAGAGGGCCCGCGGTTGCAAGGTAAGCCTATCCCTAACCCCTCCTCGGTC  
TCGATTCTACGCGTACCGGTTCATCATCACCATCACCATTGAGTTTATCTGACTAAATCTTAGTTTGTATTGTCATGTTTTAATAACAATATGTTATGT  
TTAAATATGTTTTTAATAAATTTATAAAATAATTTCAACTTTATTGTAACAACATGTCCATTTACACACTCCTTTCAAGCGCGTGGGATCGATG  
CTCACTCAAAGGCGGTAATACGGTTATCCACAGAATCAGGGGATAACCGAGGAAAGAATGTGAGC**CATATG**GGCCCATGTGAGCCATATGGTGCA  
CTCTCAGTACAATCTGCTCTGATGCCGCATAGTTAAGCCAGCCCCGACACCCGCCAACACCCGCTGACGCGCCCTGACGGGCTTGTCTGCTCCCGGC  
ATCCGCTTACAGACAAGCTG**TGACCGTCTC**CGGGAGCTGCATGTGTCAGAGGTTTTCACCGTCATCACCGAAACGCGCGA

pUbi-p63e (pUb) promoter

**CGTCTC**: BsmBI site

**CATATG**: NdeI site

**GAACGTTTC**: XmnI site

### Step 1:

The BsmBI restriction site (yellow) and surrounding nucleotides (in bold above) were first removed to generate the **pUb 3xFLAG MCS (No BsmBI)** plasmid. This was done by cutting **pUb 3xFLAG MCS** with NdeI and XmnI and inserting the following sequence between the NdeI and XmnI sites.

GGCCCATGTGAGCCATATGGTGCCTCTCAGTACAATCTGCTCTGATGCCGCATAGTTAAGCCAGCCCCGACACCCGCCAACACCCGCTGACGCGCC  
CTGACGGGCTTGTCTGCTCCCGCATCCGCTTACAGACAAGCTGTGTGATGATAAATAAGTTTCTTAGACGTCAGGTGGCACTTTTCGGGGAAATG  
TGCGGGAAACCCCTATTTGTTTATTTTCTAAATACATTCAAATATGTATCCGCTCATGAGACAATAACCCCTGATAAATGCTTCAATAATATTGAA  
AAGGAAGAGTATGAGTATTCAACATTTCCGCTGTCGCCCTTATTCCTTTTTGCGGCATTTTGCTTCTGTTTTGCTCACCCGAAACGCTGGT  
AAAGTAAAGATGCTGAAGATCAGTTGGGTGCACGAGTGGGTACATCGAATGGATCTCAACAGCGGTAAGATCTTGAGAGTTTTCGCCCCGA

### Step 2:

A guide RNA sequence containing BsmBI restriction sites that is driven by the snRNA:U6:96Ab promoter was inserted into the NdeI site.

**pUb 3xFLAG MCS (No BsmBI) + RxCas13d guide RNA** was made by inserting the following sequence into the NdeI site in **pUb 3xFLAG MCS (No BsmBI)**:

gttcgacttgcagcctgaaatacggcagcagtaggaaaagccgagtcgaaatgccgaatgcagagtctcattacagcacaatcaactcaagaaaaact  
cgacacttttttaaccatttgcacttaaatccttttttattcgctttagtataacttttttggccctaaacaaaacaaaaccaaactctcttagtctg  
gctctatattttaaactatcaatttattatagtcataaatacgaactgtgtttcaacaaaacgaacaataggacactttgattctaaaggaaattt  
tgaaaatcttaagcagaggggttcttaagaccatttgccaattcttataaattctcaactgctctttctgatgttgatcatttatataggtatgttt  
cctcaataacttggaaacctacaactggctggggttgaaacgagacggttgattttagtgcgtctcttttttt

snRNA:U6:96Ab Promoter

Terminator

RxCas13d guide RNA scaffold

BsmBI sites

**pUb 3xFLAG MCS (No BsmBI) + PspCas13b guide RNA** was made by inserting the following sequence into the NdeI site in **pUb 3xFLAG MCS (No BsmBI)**:

Gttcgacttgcagcctgaaatacggcagcagtaggaaaagccgagtcgaaatgccgaatgcagagtctcattacagcacaatcaactcaagaaaaact  
cgacacttttttaaccatttgcacttaaatccttttttattcgctttagtataacttttttggccctaaacaaaacaaaaccaaactctcttagtctg  
gctctatattttaaactatcaatttattatagtcataaatacgaactgtgtttcaacaaaacgaacaataggacactttgattctaaaggaaattt  
tgaaaatcttaagcagaggggttcttaagaccatttgccaattcttataaattctcaactgctctttctgatgttgatcatttatataggtatgttt  
cctcaataacttggagacggttgattttagtgcgtctctttttttggttggaaggtccagtttgaggggctattacaactttttttt



**pUb dRxCas13d + RxCas13d guide RNA was made by inserting the dRxCas13d ORF (catalytic dead mutations are noted in red) between Sall and AgeI in pUb 3xFLAG MCS (No BsmBI) + RxCas13d guide RNA:**

aagaccatgattgagaagaagaatcctttgccaagggatgggctgaagagcactctggtgagcggcagcaaggtgtacatgaccacctttgcag  
aggggagtgatgcccgcctggagaagatcgtggaaggggacagcatccgctctgtgaatgaaggagaagctttcagtcgacaaatggctgacaagaa  
tgctgggtacaaaatcgggaacgccaagttcagccaccccaagggatagcagtggtgtgtaacaatcctctctacacaggacctgtgcagcaggac  
atgctgggctgaaggagactttggagaagcggatattcggggagctgcagatgaaatgacaatatctgcattcaggtgatcataatattcttg  
atattgaaaagatcctggctgagtacatcacaaatgctgcatatgctgttaataacatctcaggcttggacaaggatattattgggttgggaagtt  
ttccacagtgatacctacagatgaatttaaagaccggcagccacagagctgccttcaacaataatgacaaattgatcaatgccatcaaggctcag  
tatgatgaatttgacaacttctggacaaccaaggtgggctatgttggccaggccttctcagcaaaagggccgcaactacatcatatattacg  
ggaatgaatggtatgatatcctgcgcctgctctctggcctgcccactgggtggctggcaacaacgaggaagaagcaggatttctaggacctggct  
gtacaatcttgacaagaatctggacaatgaatatactccaccctcaactatttggatgaccggatcaccaacgaactcacaacagcttttctaa  
aactcagccgcaaatgtgaactacattgcagagacactgggcatcaaccocggagtttgctgaaacagtaactccggttctccattatgaaggagc  
agaagaatttgggttttaacattactaaacttagggaggtcatgctgcagcagaaagatagctgagatccggaagaaccacaaggtcttcgattc  
catcaggacaaaagtctacacatgatggactttgttatttaccgctattacattgaagaagatgctaaagtggccgctgataaagagcctgcca  
gataatgagaatctctcagcagaagacatctttgatcaacctcggggctccttcaatgatgatcagaaggatgcaactgtactacgatgaag  
ccaaccgcatctggagaagctggagaacatcatgcacaataaaaggaattccgcggaataaagacacgggagtaacaagaagaagacgcccacg  
cctgcccagaattctgctgctggcgggatgctctgcttttcaaacatcatgctgcttgacaatgtttctggatggcaagaatcaatgat  
ttgctgacaaccctgatcaacaatttgacaacatccagagcttctcaaggtgatgcccctgattggagtaaatgcaaaatttctcaggagatg  
ccttctcaaggactctgccaagattgcccgatgagctgcgcctcattaagtcattcgcggcagggagaccatcgcagacgcaagaagagccat  
gtacatcgatgccattcgcattttgggaccaaactctctcctatgacgagctcaaaagctctggccgacaccttctctttggatgaaaatggcaacaag  
cttaagaaggggaaacatggcatgagaatttcatcatcaacaacgtcatttccaacaagcgttccactatctcatcagatagggagacctgccc  
acctgatgaaattgctaagaatgaggctgtggtgaaattcgtgctgggaagatcgcggacattcaaaagaagcaggggcagaatggaaagaacca  
atcgaccgctactatgaaacctgtatcgaaaagataaaggcaagctctgctcagtgagaagtggaacgcccctaccaagatcatcactggaatgaa  
tatgaccagttcgcacaagaaaagaagtgtgatcgaggacacagggcgggagaatgcccagagagagaagttcaagaaaattatcagcctctatctga  
ccgtcatctaccacatcctgaagaacatgttcaacatattgcccaggtacgtgattggctttcactgctggaagagatgcccagctttataagga  
gaaaggctacgacatctaacttgaaagaaactggaggagaagatattagcagcgtgaccaaactgtgtgcccgcattgacgagaccgcccctgataaa  
cggaaagatgtggagaagagatggccgagcgggccaaggagacatcgattctctgaaagtggcaaccctaaagctctacgccaattatattaaat  
attctgatgagaagaaagcagaagagttcaccggcagatcaacagggaaagggcacaacacagcctgaacgctacctgagaacaccaaagtgaa  
tgtcatcattagagaagacctgctcggattgataacaagacctgcaacctcttggcaacaagcctggcctggaagtggctcgctatgtgcat  
gcctatatcaatgacatcgctgaggtgaaactcctactccagctgtatcactacatcatgcagagaatcatatgaatgaaaggtatgagaatcat  
ctggtaaagtatctgaatctttgatgctgtcaatgatgagaagaagtacaacgacagactcctgaagctgctgtgctgcccctttggatactgcat  
ccccaggtttaaagaacctcagatattgagccctctttgataggaatgaggcagcaaaagtttgataaagaaaagaagaagtttctggaacagtgga  
agtggcgcagctgcttaccctacgacgtgctgactacgcctga

**pUb PspCas13b + PspCas13b guide RNA was made by inserting the PspCas13b ORF between Sall and MluI in pUb 3xFLAG MCS (No BsmBI) + PspCas13b guide RNA:**

aagaccatggattacaaagcagatgacgataaagGTTAACGGTACCGAGCTCCCGGGTAAATTAAGgtggatcctaacaatccccgctctggtggaaa  
accagaagaagtaactttggcacctacagcgtgatggccatgctgaacgctcagaccgtgctggaccacatccagaagtgggccgatattgagggcga  
gcagaacgagaacaacgagaatctgtggtttcaccocgtgatgagccacctgtacaacgccaagaacggtcagcaaacgagcccgagaaaacctatg  
ttcatcatcgagcggctcgagagctacttccattcctgaagatcatggcggagaaccagagagagtagcagcaacggaagtagcaagcagaaccgag  
tggaaagtgaacagcaacgacatcttcgaggtgctgaagcgcgcttccggctgctgaagatgtacaggacctgaccaaccactacaagacctacga  
gaaaagctgaacgacggtgctgagttcctgaccagcagagcaacctctgagcggcatgatcaacaactactacacagtgccctgocggaaacatg  
aacgagagatacggctacaagcagagagacctggccttcatccaggcaagcggttcaagttcgtgaaagcgcctacggcaagaaaagtcaccaag  
tgaataccggattcttctgagcctgcaggactacaacggcgcacacagaagaagctgcacctgagcggagtggaatcgccctgctgatctgct  
gttctggacaagcagatcatcaacatctttctgagcaggtgcccctcttctccagctacaatgcccagagcaggaacggcggatcatcatcaga  
tccttcggcatcaacagatcaagctgcccaggaacggatccacagcagaagtagcaacaagagcgtggccatggatagctcaacgaagtgaaagc  
ggtgcccgcagagctgttcacaacactgtctgcccagaagcagctccgggttcagaatcatcagcgcagcaccacaatgaagtgctgatgaagcggag  
cagcagacagattcgtgctctgctgctgagatatactgattacggcaagctgttcgaccacatcaggttccacgtgaaacatgggcaagctgagatac  
ctgctgaaaggccgacaagacctgcatcagcggccagaccagagtagagtgatcagcagcctgaaacggcttccgagactggaagaggccgaga  
caatgcccgaagcaagagaacggcaccttcggcaacagcggcatccggatcagagactcagagaacatgaagcgggacgagcacaatcctgccaacta  
tcctacatcgtggacacctacacacactacatcctggaaaaacaaggtcagagatgttatacaacgacaagaggacagcgcctcctgctgccc  
gtgatcaggatgatagatcgtggtcaagacaatccccagctgcccgatgagcaccctggaaaattccagccatggccttccacatgtttctgtctg  
gcagcaagaaaaccgagaagctgatcgtggagctgcaaacccgggtacaagagactgttccagggccatgcagaagaagaagtgaccgcccagaaat  
cgccagcttcggaatcggcagcagcagcctgctcagaagatcctggatctgatcagcggcaatgccacggcaaggtatgggacgcttcatcaga  
ctgaccgtggacgacatgctgaccgacaccgagcggagaatcaagagattcaaggacgaccggaagtcattcggagcgcgcaacaagaatgggaa  
agagagccttcaagcagatctccacaggaagctggccgactcctggccaagggacatcgtgctgttccagcccagcgtgaaacgatggcgagaacaa  
gatcaccggcctgaactaccggatcatgcagagcgcattgcccgtgtacgatagcggcagcagatcagaggccaagcagcagttcaagctgatgttc  
gagaagcccggctgatcggcaaggcacaacagagcctcattctgtacaaggtgttccgcccagcagatccccgcaatgcccgtcagctgtct  
acgagcctaccctgatcagcagcggaggttctacctgaccggcctgctcaacagagatcaagaaagggcacaagagtggtgtgcttccctcctcggcggga  
ccagaacaagtggaacaaccccgcctgaagaacctgggcagaatctacagcagggatctgcccgtggaactgccagacagatgttcgacaatgag

atcaagtcccacctgaagtccttgccacagatggaaggcatcgacttcaacaatgccaacgtgacctatctgatcgccgagtagatgaagagagtgctg  
tggacgacgacttccagaccttctaccagtggaaccgcaactaccggtacatggacatgcttaagggcgagtagcagacgaaaggggctccctgcagca  
ctgcttaccagcgtggaagagagagaaggcctctggaagagcgggctccagaacagagcggtagacgaaagcaggccagcaacaagatcccgcagc  
aacggcagatgagaacccgacgagcgaagagatcgagacaatctggataaagcggctgagcaaacgcccgaacgagtagcagaaaagcgaagaaag  
tgatccggcgctacagagtgaggatgcccctgctgttctgctggccaaaaagacctgaccgaactggccgatcttgcagcggcgagaggttcaact  
gaaagaaatcatgcccagcggcagaagggaaatcctgagcgagatcatgccatgagcttcaacctcgagaaagggcggaagaagtagacacatcacc  
agcgagggcatgaagctgaagaactacggcacttcttctgctggctagcacaagaggatcggcaacctgctggaactcgtgggacgagcagatcg  
tgtcaaaagggatcatggaagaggtcaacaatacgcaccagtgaggcccgagatcagctccatcgtgttcaacctggaaaagtgggccttcca  
cacataccccgagctgctgcccagagtgaccgggaagagaaggtggacttcaagagatcctgaaaaatcctgctgaaacaagaacatcaacaaa  
gagcagagcgacatcctgcggaagatccggaacgccttcgatcacaacaattaccggcaaaagggcgtggtggaatcaaggccctgctgagatcg  
ccatgagcatcaagaaggccttggggagtagccatcatgaagggaagtggtaccctacgacgtgctgactacgctga

**pUb dPspCas13b + PspCas13b guide RNA was made by inserting the dPspCas13b ORF (catalytic dead mutations are noted in red) between Sall and Mlul in pUb 3xFLAG MCS (No BsmBI) + PspCas13b guide RNA:**

aagaccatggattacaagaagcagatgacgataagGTTAACGGTACCGAGCTCCCCGGGTTAATTAAGgtggatctAACATCCCCGCTCTGGTGGAAA  
ACCAGAAGAAGTACTTTGGCACCTACAGCGTGTGGCCATGCTGAACGCTCAGACCGTGTGGACCACATCCAGAAGTGGCCGATATTGAGGGCGA  
GCAGAACGAGAACAACGAGAATCTGTGGTTTCAACCCGCTGATGAGCCACCTGTACAACGCCAAGAACGGCTACGACAGCAGCCCCGAGAAAACCATG  
TTCATCATCGAGCGGCTGCAGAGCTACTTCCATTCTGAAGATCATGGCCGAGAACCAGAGAGAGTACAGCAACGGCAAGTACAAGCAGAACC  
TGGAAGTGAACAGCAACGACATCTTCGAGGTGCTGAAGCGCGCTTCGGCGTCTGAAGATGTACAGGGACCTGACCAACGCAATACAAGACCTACGA  
GGAAAAGCTGAACGACGGCTGCGAGTTCCTGACCAGCACAGAGCAACCTCTGAGCGGCATGATCAACAACACTACTACACAGTGGCCCTGCGGAACATG  
AACGAGAGATACGGCTACAAGACAGAGGACCTGGCCTTCATCCAGGACAAGCGGTTCAAGTTCGTGAAGGACGCTACGGCAAGAAAAGTCCCAAG  
TGAATACCGGATCTTCTGAGCCTGCAGGACTACAACGGCGCACACAGAAGAAGCTGCACCTGAGCGGAGTGGGAATCGCCCTGCTGATCTGCCT  
GTTCTGGACAAGCAGTACATCAACATCTTCTGAGCAGGCTGCCATCTTCTCCAGTACAATGCCAGAGCGAGGAACGGCGGATCATCATCAGA  
TCCTTCGGCATCAACAGCATCAAGCTGCCAAGGACCGGATCCACAGCGAGAAGTCCAACAAGAGCGTGGCCATGGATATGCTCAACGAAGTGAAGC  
GGTCCCCGACGAGCTGTTCAACAACACTGTCTGCCGAGAAGCAGTCCCGGTTTCAAGATCATCAGCGACGACCAATGAAGTCTGATGAAGCGGAG  
CAGCGACAGATTCGTGCCTCTGCTGCTGCAGTATATCGATTACGGCAAGCTGTTCCAGCCACATCAGGTTCCAGTGAACATGGGCAAGCTGAGATAC  
CTGCTGAAGGCCGACAAGACCTGCATCGACGGCCAGACGAGTGCAGAGTGTGAGCAGCCCTGAACGGCTTCGGCAGACTGGAAGAGGCCGAGA  
CAATGCGGAAGCAAGAGAACGGCACCTTCGGCAACAGCGGCATCCGGATCAGAGACTTCGAGAACATGAAGCGGGACGACGCCAATCTGCCAACTA  
TCCCTACATCGTGGACACCTACACACTACATCTGGAAAACAACAGGTCGAGATGTTTATCAACGACAAGAGGACAGCCCCACTGCTGCC  
GTGATCGAGGATGATAGATACGTGGTCAAGACAATCCCGAGCTGCCGATGACACCTGGAATTCAGCCATGGCCTTCCACATGTTTCTGTTCG  
GCAGCAAGAAAACCGAGAAGCTGATCGTGGACGTGCACAACCGGTACAAGAGACTGTTCCAGGCCATGCAGAAAAGAAGTACCAGCCGAGAATAT  
CGCCAGCTTCGGAATCGCCGAGAGCAGCTGCCTCAGAAGATCCTGGATCTGATCAGCGGCAATGCCACGGCAAGGATGTGGACGCTTCATCAGA  
CTGACCGTGGACGACATGCTGACCGACACCGAGCGGAGAATCAAGAGATTCAGGACGACCGGAAGTCCATTCGGAGCGCCGACAACAAGATGGGAA  
AGAGAGGCTTCAAGCAGATCTCCACAGGCAAGCTGGCCGACTTCTGGCAAGGACATCGTGTGTTTCAGCCAGCGTGAACGATGGCGAGAACA  
GATCACGGCCTGAACCTACCGGATCATGCAGAGCGCCATTGGCGTGTACGATAGCGGGCAGCATACGAGGCCAAGCAGAGTTCAGACTGATGTTT  
GAGAAGGCCCGGCTGATCGGCAAGGGCACAAACAGAGCCTCATCCATTTCTGTACAAGGTGTTCCGCCGAGCATCCCCGCCAATGCCGTCGAGTTC  
ACGAGCGCTACCTGATCGAGCGAAGTTCATCTGACCGCCTGTCCAACGAGATCAAGAAAGGCAACAGAGTGGATGTGCCCTTCATCCGGCGGGA  
CCAGAACAAGTGGAAAACACCCGCCATGAAGACCTGGGCAGAACTACAGCGAGGATCTGCCCGTGAACCTGCCAGACAGATGTTGCACAATGAG  
ATCAAGTCCCACCTGAAGTCCCTGCCACAGATGGAAGGCATCGACTTCAACAATGCCAACGTGACCTATCTGATCGCCGAGTACATGAAGAGAGTGC  
TGGACGACACTCCAGACCTTACCAGTGGAAACCGCAACTACCGGTACATGGACATGCTTAAGGGCGAGTACGACGAAAAGGGCTCCCTCCAGCA  
CTGCTTCCACAGCGTGAAGAGAGAGAAGGCTCTGGAAAAGCGGGCTCCAGAACAAGAGCGGTACAGAAAAGCAGGCAACAGATCCCGCAGC  
AACCGGCAGATGAGAAAACGCCAGCAGCGAAGAGATCGAGACAATCTGGATAAGCGGTGAGCAACAGCCGGAACGAGTACCAGAAAAGCGAGAAAG  
TGATCCGGCGCTACAGAGTGCAGGATGCCCTGCTGTTTCTGCTGGCCAAAAGACCTGACCGAACTGGCCGATTTGACGGCGAGAGGTTCAAAC  
GAAAGAAATCATGCCCGACCCGAGAAGGGAACTCTGAGCGAGATCATGCCATGAGCTTCACTTCGAGAAAAGGGCGCAAGAAGTACACCATCACC  
AGCGAGGGCATGAAGCTGAAGAACTACGGCAGCTTCTTGTGCTGGCTAGCGACAAGAGGATCGGCAACCTGCTGAACTCGTGGCAGCGACATCG  
TGTTCAAAGAGGATATCATGGAAGAGTTCAAACAATAACAGCAGTGCAGGCGAGATCAGCTCCATCGTGTTCACCTGGAAAAGTGGGCCCTTCGA  
CACATACCCCGAGCTGTCTGCCAGAGTGGACCGGGAAGAGAAGGTGGACTTCAAGAGCATCTGAAAATCTGCTGAAACAACAAGAATCAACAAA  
GAGCAGAGCGACATCTCGGGAAGatccggaacgccttcgatcacaacaattaccggcaaaagggcgtggtggaatcaaggccctgctgagatcg  
ccatgagcatcaagaaggccttggggagtagccatcatgaagggaagtggtaccctacgacgtgctgactacgctga

**pUb LwaCas13a + LwaCas13a guide RNA was made by inserting the LwaCas13a ORF sequence between SpeI and AgeI in pUb 3xFLAG MCS (No BsmBI) + LwaCas13a guide RNA:**

caaagtgaccaaggtcgacggcatcagccacaagaagtagatcgaagagggcaagctcgtgaagtccaccagcggagaaaaccggaccagcgagaga  
ctgagcgagctgctgagcatccggctggacatctacatcaagaacccgacaacgcctccgaggaagagaaccggatcagaagagagaacctgaaga  
agttcttagcaacaaggtgctgcacctgaaggacagcgtgctgtatctggaagaccggaaagaaaagaacccgctgacaggacaagaactatagcga  
agagacatcagcgagtacagcctgaaaaacaagaacgcttccgtgtaagaagatcctgctgaacagaggaactcctgaggaactggaa  
atcttccggaaggacgtggaagccaagctgaacaagatcaacagcctgaagtagcgttcaagagagaacaaggccaactaccagaagatcaacgaga

acaacgtggaaaaagtgggcggaagagcaagcggaaacatcatctacgactactacagagagagcgccaagcgcaacgactacatcaacaacgtgca  
ggaagccttcgacaagctgtataagaaaaggatatacgagaaactgttttctctgatcgagaacagcaagaagcagagaagtaacaagatccgagag  
tactatcacaagatcatcggccggaagaacgacaaaagagaacttcgccaagattatctacgaagagatccagaacgtgaacaacatcaaagagctga  
ttgagaagatccccgacatgtctgagctgaagaaaagccaggtgttctacaagtactacctggacaaaagaggaactgaacgacaagaatattaagta  
cgcttctgcccacttcgtggaaaatcgagatgtcccagctgctgaaaaactacgtgtacaagcggctgagcaacatcgcaacgataagatcaagcgg  
atcttcgagtagcagaatctgaaaaagctgatcgaaaacaaactgctgaacaagctggacacctacgtgcggaactcggcgaagtacaactactatc  
tgcaagtgggagagatcgccacctccgactttatcgcccggaaaccgagcaagcagagccttctctgagaacatcatcggcgtgtccagcgtggccta  
cttcagcctgaggaacatcctggaaaccgagaacgagaacggatcaccggccggatgctggggcaagaccgtgaagaacaacaagggcggaagagaaa  
tacgtgtccggcaggtggacaagatctacaatgagaacaagcagaacgaagtgaagaaaaatctgaagatgttctacagctacgacttcaacatgg  
acaacaagaacgagatcgaggacttcttcgccaacatcgacgaggccatcagcagcatcagacacggcatcgtgacttcaacctggaaactggaagg  
caaggacatcttcgcttcaagaatctcgccccagcagatctccaagaagatgttctcagaacgaaatcaacgaaaaagaagctgaagctgaaaaatc  
ttcaagcagctgaacagcggcaacgtgttcaactactacgagaaggatgtgatcatcaagtaacctgaagaataccaagttcaacttctgtaacaaaa  
acatcccccttcgtgcccagcttcaacaagctgtacaacaagattgagagacctcggaatacctgaagtgtttttggagcgtgcccaggacaaga  
agagaaggagccagatctacctgctgaagaatatactactacggcaggttctctgaacaagttcgtgaaaaactccaaggtgttctttaagatcacc  
aatgaagtgatcaagattaacaagcagcggaaaccgaaaaaccggccactacaagatcagaagttcgagaacatcgagaaaaaccgtgcccgtggaat  
acctggccatcatccagagcagagatgatcaacaaccaggacaaaagaggaaaaagaatcctacatcgactttattcagcagatcttctgaaagg  
cttcatcgactacctgaacaagaacaatctgaagtatactgagagcaacaacaacaatgacaacaacgacatcttctccaagatcaagatcaaaaag  
gatacaaaagagaagtagacaagatcctgaagaactatgagaagcacaatcggaacaagaatccctcagcagatcaatgagttcgtgcccgaga  
tcaagctggggaagattctgaagtacaccgagaatctgaacatgttttacctgatcctgaagctgctgaaccacaaagagctgaccaacctgaagg  
cagcctggaaaaagtaccagtcggccaaacaagaagaaaccttcagcagcaggttggaaactgtaaacctgctgaacctggacaacaacagagtgacc  
gaggacttcgagctggaagcacaagcagatcggaagttcctggacttcaacgaaaaacaaatcaaggaccggaagagctgaaaaagttcgacacca  
acaagatctatttcgacggcagagaacatcatcaagcaccggccttctacaatatcaagaaatcggcatgctgaatctgctgaaaaagatcgccga  
taaggccaagatataagatcagcctgaaagaactgaaagagtagcaacaagaagaatgagattgaaaagaactacaccatgcagcagaacctgcac  
cggaagtagcggcagccaagaaggacgaaaaagttcaacgacgaggactacaagagtagtagaaggccatcggaacatccagaagtagaccacc  
tgaagaacaaggtggaattcaatgagctgaacctgctgcagggcctgctgctgaagatcctgcaccggctcgtgggctaccaccagcatctgggagcg  
ggactgagattccggctgaaagggcgagtttcccgagaaccactacatcgaggaaatttcaatttcgacaactccaagaatgtgaagtacaaaagc  
ggccagatcgtggaaaagtatactcaacttctacaaagaactgtacaaggacaaatgtggaaaagcggagcatctactccgacaagaaagtgaagaaac  
tgaagcaggaaaaaaggacctgtacatccggaactacattgcccacttcaactacatccccacgcccagattagcctgctggaagtgtggaaaa  
cctgcccgaagctgctgtcctacgaccggaagctgaagaacgcatcatgaagtcacatcgtggacattctgaaagaatcggcctcgtggccaccttc  
aagatcggcgtgacaagaagatcgaatccagacctggaatcagagaagatcgtgcacctgaagaatctgaagaaaaagaaactgatgaccgacc  
gaaacagcgggaactgtgcaactcgtgaaagtcatgttcgagtagcaaggccctggaaggaaagtggtaccctcagcagctgctgactacgctcctg

Guide RNA sequences were then cloned into the corresponding plasmids described above. All guide RNAs used in the study were ordered as paired forward/reverse oligos and the sequences are provided in **Supplementary Tables S1 and S2**. Oligos were phosphorylated and annealed using the following 10  $\mu$ L reactions:

- 1  $\mu$ L 100  $\mu$ M Forward oligo
- 1  $\mu$ L 100  $\mu$ M Reverse oligo
- 1  $\mu$ L 10 mM ATP
- 1  $\mu$ L 10x T4 Polynucleotide Kinase Buffer
- 0.5  $\mu$ L T4 Polynucleotide Kinase (NEB)
- 5.5  $\mu$ L Water

Reactions were incubated in a PCR machine at 37°C for 30 min, followed by 95°C for 5 min, followed by a ramp down to 25°C (0.1°C/sec). Ligations were then performed using purified plasmids cut with BsmBI.

*Drosophila* expression plasmids expressing only a guide RNA (without Cas13 effector) were generated from **pUb 3xFLAG MCS (No BsmBI) + RxCas13d guide RNA** (for plasmids used in **Supplementary Figure S2**) or from **pUb 3xFLAG MCS (No BsmBI) + PspCas13b guide RNA**

(for plasmids used in **Supplementary Figure S7**) by phosphorylating, annealing, and ligating the guide RNA oligos as described above.

**Reporter plasmids generated:**

**Hy\_pMtnA mCherry SV40** (Addgene #176302) was made by inserting a 3x FLAG tagged mCherry ORF between the XhoI and NotI sites in **Hy\_pMT EGFP SV40 pA Sense** (Addgene #69911):

```
accatggactacaagaccatgacgggtgattataaagatcatgacatcgattacaaggatgacgatgacaagaccgggtGTGAGCAAGGGCGAGGAgg  
ataaacatggccatcatcaaggagttcatgcgcttcaaggtgacatggagggtcccgtaacggccacgagttcgagatcgagggcgagggcgaggg  
ccgcccctacgagggcaccagaccgcaagctgaagtgaccaaggtggccccctgcccttcgctgggacatcctgtcccctcagttcatgtac  
ggctccaaggcctacgtgaagcaccggccgacatccccgactcttgaagctgtccttccccgagggcttcaagtgaggcgcggtgatgaacttcg  
aggacggcgcggtggtgaccgtgacccaggactcctccctgacggagcggcgagttcatctacaaggtgaagctgcgccgaccacactcccctccga  
cggccccgtaatgcagaagaagaccatgggctgggagggcctcctccgagcggatgtacccccgaggacggcgccctgaagggcgagatcaagcagagg  
ctgaagctgaagcagcggccactacgacgctgaggtcaagaccacctacaaggccaagaagccccgtgcagctgccccggcgctacaacgtcaaca  
tcaagttggacatcacctcccacaacgaggactacaccatcgtggaacagtaacgaacgcggcggagggccgcccactccaccggcgCATGGACGAGCT  
GTACAAGTAG
```

**Hy\_pMtnA FFLuc SV40** (Addgene #176299) was made by inserting the firefly luciferase (FFLuc) ORF between the XhoI and NotI sites in **Hy\_pMT EGFP SV40 pA Sense** (Addgene #69911):

```
accatggaagatgccccaaacattaagaagggcccagcgcatttctaccactcgaagacgggaccgcccggcgagcagctgcacaaagccatgaagc  
gctacgcccctggtgccccgaccatcgcttaccgacgcacatatacgaggtggacattaccctacgcccagtagtacttcgagatgagcgttcggctggc  
agaagctatgaagcgctatgggctgaatataaaaccatcgatcgtggtggtgcagcgagaatagcttgcagttcttcatgcccgtggtgggtgcccctg  
ttcatcgggtggtggtggtgccccagctaacgacatctacaacgagcgcgagctgctgaacagcatgggcatcagccagcccaccgtcgtattcgtga  
gcaagaaagggctgcaaaagatcctcaacgtgcaaaagaagctaccgatcatacaaaagatcatcatcatggtatagcaagaccgactaccagggtt  
ccaaagcatgtacaccttcgtgacttcccatttgccaccccgttcaacgagtagcacttcgctgcccagagcttcgaccgggacaaaaccatcgcc  
ctgatcatgaacagtagtggcagtagccgattgcccaggggctagccctaccgcaccgcaccgcttgtgtccgattcagtcagcccgcgacccca  
tcttcggcaaccagatcatccccgacaccgctatcctcagcgtggtgcccatttcaccaagccttcggcatggttccaacgctgggctacttgatctg  
cggcttccgggtcgtgctcatgtaccgcttcgaggagagctattcttgcgcagcttgaagactataagattcaatctgcccctgctggtgcccaca  
ctatcttagcttcttcgtaagagcactctcatcgacaagtacgacctaagcaacttgcaagagatcgccagcggggggggcgccgctcagcaaggagg  
taggtgagggcctggccaaacgcttccacctaccaggcatccgcccagggtacggcctgacagaaacaaccagcggcattctgatccccccgaagg  
ggacgacaagcctggcgcagtaggcaaggtggtgccccttcttcgaggcctaaggtggtggacttggacaccggtaagacactgggtgtgaaccagcgc  
ggcgagctgtgctccgctggccccatgatcatgagcggctacgttaacaacccccgagggctacaacgctctcatcgacaaggacggctggctgcaca  
cgggcgacatcgccactgaggacgagcagcacttcttcatcgtggacggcgtgaagagcctgatcaaatacaagggtaccaggtagccccagc  
cgaactggagagcatcctgctgcaacacccccacatcttcgacgcgggggtgcggcctgcccgaagcagatgcccggcagctgcccggcagctc  
gtcgtgctggaacacggtaaaacatgaccgagaaggagatcgtggactatgtggccagccaggttaaccgccaagaagctgcccgggtggtggtg  
tgttcgtggacaggtgctaaaggactgaccggcaaggttgacggccgaagatccgagatctcattaaaggccaagaagggcgccaagatcgc  
cgtggactacaagaccatgacgggtgattataaagatcatgacatcgattacaaggatgacgatgacaagtaa
```

**Hy\_pUbi-p63e mCherry SV40** (Addgene #176300) was made by inserting the mCherry ORF between the XbaI and NotI sites in **Hy\_pUbi-p63e eGFP SV40** (Addgene #132650):

```
ATGGTGTGAGCAAGGGCGAGGAggataaacatggccatcatcaaggagttcatgcgcttcaaggtgacatggagggtcccgtaacggccacgagttcg  
agatcgagggcgagggcgagggccgcccctacgagggcaccagaccgccaagctgaaggtgaccaaggggtggccccctgcccttcgctgggacat  
cctgtcccctcagttcatgtacggctccaaggcctacgtgaagcaccggccgacatccccgactactgaagctgtccttccccgagggcttcaag  
tgggagcgcgtgatgaacttcgaggacggcgcggtggtgaccgtgaccagagactcctcccctcagggacggcgagttcatctacaaggtgaagctgc  
cgccgaccacactcccctccgacggccccgtaatgcagaagaagaccatgggctgggagggcctcctccgagcggatgtacccccgaggacggcgccct  
gaagggcgagatcaagcagaggctgaagctgaaggacggcgccactacgacgctgaggtcaagaccctacaaggccaagaagccccgtgcagctg
```



ccggcgctacaacgtcaacatcaagttggacatcacctcccacaacgaggactacaccatcgtggaacagtacgaacgcgcccggggccgact  
ccaccggcggCATGGACGAGCTGTACAAGTGA

**pcDNA3.1(+)** mCherry (Addgene #176301) was made by inserting the mCherry ORF between the HindIII and XbaI sites in **pcDNA3.1(+)** eGFP (Addgene #129020):

GccaccATGGTGAGCAAGGGCGAGGAggataaacatggccatcatcaaggagttcatgcgcttcaagggtgcacatggagggctccgtgaacggccacg  
agttcgagatcgagggcgagggcgagggccgcccctacgagggcaccagaccgccaagctgaagggtgaccaaggggtgccccctgcccttcgctg  
ggacatcctgtcccctcagttcatgtacggctccaaggcctacgtgaagcaccgcccgcacatcccgcactactgaagctgtccttcccggagggc  
ttcaagtgaggagcgggtgatgaacttcgaggacggcggcggtgaccgtgaccaggactcctcctgcaggacggcgagttcatctacaaggtga  
agctgcgcccacccaacttcccctccgacggccccgtaatgcagaagaagaccatgggctgggagggcctcctccgagcggatgtaccccgaggacgg  
cgccctgaagggcgagatcaagcagaggctgaagctgaaggacggcggccactacgacgctgagggtcaagaccactacaaggccaagaagcccgtg  
cagctgcccggcgctacaacgtcaacatcaagttggacatcacctcccacaacgaggactacaccatcgtggaacagtacgaacgcgcccggggcc  
gccactccaccggcggCATGGACGAGCTGTACAAGTGA
